# Supplementary material
Source: PubMed Central journal article supplement (PMC8024390)
Supplement: Supp_Figure1.pdf [file Supp_Figure1.pdf]

## Supplementary Data

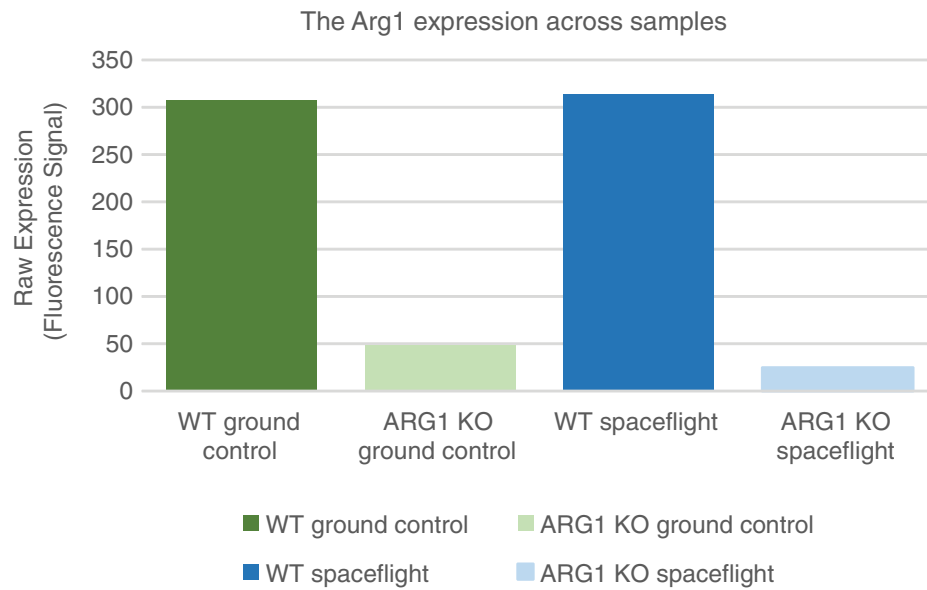

**SUPPLEMENTARY FIG. S1.** The bar chart showing the Arg1 gene expression across samples. The MAS5 normalized raw expression values of the Arg1 transcript obtained from the microarray fluorescent signal were plotted for the ground control samples (shades of green) and spaceflight samples (shades of blue) and for WT (darker tone) and ARG1 KO cells (lighter tone).
