# Supplementary material
Source: PubMed Central journal article supplement (PMC8024390)
Supplement: Table_S1.pdf [file Table_S1.pdf]

| #   | ProbeID     | IgFC<br>F <sup>wt</sup> :G <sup>wt</sup> | pValue<br>F <sup>wt</sup> :G <sup>wt</sup> | TranscriptID | Alias       | Full name                                                                     |
|-----|-------------|------------------------------------------|--------------------------------------------|--------------|-------------|-------------------------------------------------------------------------------|
| 1   | 257682_at   | 3.6                                      | 0.0011                                     | At3g13240    |             | hypothetical protein                                                          |
| 2   | 249482_at   | 3.3                                      | 0.0068                                     | At5g38980    |             | putative protein                                                              |
| 3   | 246816_at   | 3.2                                      | 0.0000                                     | At5g27230    |             | Frigida-like protein                                                          |
| 4   | 257064_at   | 3.1                                      | 0.0008                                     | At3g18260    |             | Reticulon family protein                                                      |
| 5   | 262276_at   | 3.0                                      | 0.0039                                     | At1g68700    |             | hypothetical protein                                                          |
| 6   | 249647_at   | 2.9                                      | 0.0058                                     | At5g37040    |             | F-box family protein                                                          |
| 7   | 259970_at   | 2.8                                      | 0.0029                                     | At1g76570    |             | Chlorophyll A-B binding family protein                                        |
| 8   | 260265_at   | 2.7                                      | 0.0088                                     | At1g68510    | LBD42       | LOB domain-containing protein 42                                              |
| 9   | 247704_at   | 2.7                                      | 0.0040                                     | At5g59515    |             | Expressed protein                                                             |
| 10  | 251262_at   | 2.6                                      | 0.0020                                     | At3g62080    |             | SNF7 family protein                                                           |
| 11  | 262826_at   | 2.6                                      | 0.0001                                     | At1g13080    | CYP71B2     | cytochrome P450, family 71, subfamily B, polypeptide 2                        |
| 12  | 252739_at   | 2.6                                      | 0.0073                                     | At3g43250    |             | Family of unknown function (DUF572)                                           |
| 13  | 263219_at   | 2.5                                      | 0.0013                                     | At1g30600    |             | Subtilase family protein                                                      |
| 14  | 248510_at   | 2.5                                      | 0.0046                                     | At5g50315    |             | transposable element gene                                                     |
| 15  | 261452_s_at | 2.5                                      | 0.0014                                     | At1g21020    |             | transposable element gene                                                     |
| 16  | 260156_at   | 2.5                                      | 0.0096                                     | At1g52880    | NARS2       | NAC (No Apical Meristem) domain transcriptional regulator superfamily protein |
| 17  | 262102_at   | 2.5                                      | 0.0074                                     | At1g02980    | CUL2        | cullin 2                                                                      |
| 18  | 253636_at   | 2.5                                      | 0.0090                                     | At4g30500    |             | Protein of unknown function (DUF788)                                          |
| 19  | 255383_at   | 2.4                                      | 0.0001                                     | At4g03570    |             | Cystatin/monellin superfamily protein                                         |
| 20  | 248708_at   | 2.4                                      | 0.0082                                     | At5g48560    |             | basic helix-loop-helix (bHLH) DNA-binding superfamily protein                 |
| 21  | 251068_at   | 2.4                                      | 0.0033                                     | At5g01920    | STN8        | Protein kinase superfamily protein                                            |
| 22  | 257504_at   | 2.3                                      | 0.0081                                     | At1g52250    |             | dynein light chain, putative similar to dynein light chain 1, cytoplasmic     |
| 23  | 258672_at   | 2.3                                      | 0.0036                                     | At3g08570    |             | Phototropic-responsive NPH3 family protein                                    |
| 24  | 247333_at   | 2.3                                      | 0.0052                                     | At5g63600    | FLS5        | flavonol synthase 5                                                           |
| 25  | 255481_at   | 2.2                                      | 0.0060                                     | At4g02460    | PMS1        | DNA mismatch repair protein, putative                                         |
| 26  | 266591_at   | 2.2                                      | 0.0084                                     | At2g46225    | ABIL1       | ABI-1-like 1                                                                  |
| 27  | 247415_at   | 2.2                                      | 0.0072                                     | At5g63060    |             | Sec14p-like phosphatidylinositol transfer family protein                      |
| 28* | 256609_at   | 2.1                                      | 0.0012                                     | At3g30843    |             | transposable element gene                                                     |
| 29  | 258943_at   | 2.0                                      | 0.0082                                     | At3g10400    | U11/U12-31K | RNA recognition motif and CCHC-type zinc finger domains containing protein    |
| 30  | 264698_at   | 2.0                                      | 0.0050                                     | At1g70200    |             | RNA-binding (RRM/RBD/RNP motifs) family protein                               |
| 31  | 255175_at   | 1.9                                      | 0.0039                                     | At4g07960    | CSLC12      | Cellulose-synthase-like C12                                                   |
| 32  | 262786_at   | 1.9                                      | 0.0022                                     | At1g10740    |             | alpha/beta-Hydrolases superfamily protein                                     |
| 33* | 248008_at   | 1.9                                      | 0.0085                                     | At5g56270    | WRKY2       | WRKY DNA-binding protein 2                                                    |
| 34  | 248770_at   | 1.7                                      | 0.0087                                     | At5g47740    |             | Adenine nucleotide alpha hydrolases-like superfamily protein                  |
| 35  | 264489_at   | 1.7                                      | 0.0100                                     | At1g27370    | SPL10       | squamosa promoter binding protein-like 10                                     |
| 36  | 261071_at   | 1.5                                      | 0.0070                                     | At1g07380    |             | Neutral/alkaline non-lysosomal ceramidase                                     |
| 37  | 254316_at   | 1.5                                      | 0.0067                                     | At4g22500    |             | putative protein glycine-rich cell wall protein precursor                     |
| 38  | 267197_at   | 1.4                                      | 0.0039                                     | At2g30960    |             | hypothetical protein                                                          |
| 39  | 267392_at   | 1.4                                      | 0.0040                                     | At2g44490    | PEN2        | Glycosyl hydrolase superfamily protein                                        |
| 40  | 247441_at   | 1.4                                      | 0.0023                                     | At5g62710    |             | Leucine-rich repeat protein kinase family protein                             |
| 41  | 248987_at   | 1.3                                      | 0.0027                                     | At5g45180    |             | Flavin-binding monooxygenase family protein                                   |
| 42  | 264299_s_at | 1.3                                      | 0.0000                                     | At1g78860    |             | D-mannose binding lectin protein with Apple-like carbohydrate-binding domain  |
| 43  | 259757_at   | 1.2                                      | 0.0038                                     | At1g77510    | PDIL1-2     | PDI-like 1-2                                                                  |
| 44  | 250807_at   | 1.1                                      | 0.0070                                     | At5g05130    |             | DNA/RNA helicase protein                                                      |
| 45* | 258679_at   | 1.1                                      | 0.0016                                     | At3g08590    | iPGAM2      | Phosphoglycerate mutase, 2,3-bisphosphoglycerate-independent                  |
| 46  | 264042_at   | 1.1                                      | 0.0004                                     | At2g03760    | ST1         | sulphotransferase 12                                                          |
| 47  | 246251_at   | -1.1                                     | 0.0074                                     | At4g37220    |             | Cold acclimation protein WCOR413 family                                       |
| 48  | 252234_at   | -1.2                                     | 0.0012                                     | At3g49780    | PSK4        | phytosulfokine 4 precursor                                                    |
| 49  | 262135_at   | -1.2                                     | 0.0080                                     | At1g78080    | WIND1       | related to AP2 4                                                              |
| 50  | 246199_at   | -1.2                                     | 0.0088                                     | At4g36530    |             | alpha/beta-Hydrolases superfamily protein                                     |
| 51  | 267359_at   | -1.3                                     | 0.0020                                     | At2g40020    |             | Nucleolar histone methyltransferase-related protein                           |
| 52  | 266440_at   | -1.3                                     | 0.0051                                     | At2g43240    |             | Nucleotide-sugar transporter family protein                                   |
| 53  | 261220_at   | -1.4                                     | 0.0030                                     | At1g19970    |             | ER lumen protein retaining receptor family protein                            |
| 54  | 262975_at   | -1.4                                     | 0.0069                                     | At1g75540    | STH2        | salt tolerance homolog2                                                       |
| 55  | 246010_at   | -1.4                                     | 0.0045                                     | At5g08440    |             | putative protein                                                              |
| 56  | 267544_at   | -1.5                                     | 0.0050                                     | At2g32720    | CB5-B       | cytochrome B5 isoform B                                                       |
| 57  | 261162_at   | -1.6                                     | 0.0022                                     | At1g34440    |             | hypothetical protein                                                          |
| 58  | 247971_at   | -1.7                                     | 0.0039                                     | At5g56730    |             | Insulinase (Peptidase family M16) protein                                     |
| 59  | 246247_at   | -1.8                                     | 0.0069                                     | At4g36640    |             | Sec14p-like phosphatidylinositol transfer family protein                      |
| 60  | 263911_at   | -1.8                                     | 0.0063                                     | At2g36560    |             | AT hook motif DNA-binding family protein                                      |
| 61  | 257045_at   | -2.0                                     | 0.0062                                     | At3g19730    |             | hypothetical protein                                                          |
| 62  | 260132_s_at | -2.0                                     | 0.0081                                     | At1g66640    |             | RNI-like superfamily protein                                                  |
| 63  | 249037_at   | -2.1                                     | 0.0069                                     | At5g44130    | FLA13       | FASCI-LIN-like arabinogalactan protein 13 precursor                           |
| 64  | 251383_at   | -2.2                                     | 0.0033                                     | At3g60740    | TTN1        | ARM repeat superfamily protein                                                |
| 65  | 259214_at   | -2.2                                     | 0.0025                                     | At3g09085    |             | Protein of unknown function (DUF962)                                          |
| 66  | 267091_at   | -2.3                                     | 0.0047                                     | At2g38185    |             | RING/U-box superfamily protein                                                |
| 67  | 264136_at   | -2.4                                     | 0.0005                                     | At1g78980    | SRF5        | STRUBBELIG-receptor family 5                                                  |
| 68  | 261234_x_at | -2.4                                     | 0.0091                                     | At1g32830    |             | transposable element gene                                                     |
| 69  | 266802_at   | -2.4                                     | 0.0019                                     | At2g22900    |             | Galactosyl transferase GMA12/MNN10 family protein                             |

|    |             |      |        |           |        |                                                      |
|----|-------------|------|--------|-----------|--------|------------------------------------------------------|
| 70 | 255385_at   | -2.6 | 0.0054 | At4g03610 |        | Metallo-hydrolase/oxidoreductase superfamily protein |
| 71 | 249968_at   | -2.6 | 0.0038 | At5g19070 |        | SNARE associated Golgi protein family                |
| 72 | 263964_at   | -2.7 | 0.0038 | At2g12880 |        | Zinc knuckle (CCHC-type) family protein              |
| 73 | 261292_at   | -2.7 | 0.0074 | At1g36940 |        | hypothetical protein                                 |
| 74 | 266634_at   | -2.7 | 0.0043 | At2g35530 | bZIP16 | basic region/leucine zipper transcription factor 16  |
| 75 | 263111_s_at | -2.8 | 0.0058 | At1g65190 |        | Protein kinase superfamily protein                   |
| 76 | 254416_at   | -2.9 | 0.0059 | At4g21380 | RK3    | receptor kinase 3                                    |
| 77 | 249622_at   | -3.3 | 0.0013 | At5g37550 |        | putative protein                                     |
| 78 | 250582_at   | -3.3 | 0.0008 | At5g07580 |        | Integrase-type DNA-binding superfamily protein       |
