# Supplementary material
Source: PubMed Central journal article supplement (PMC8024390)
Supplement: Table_S2.pdf [file Table_S2.pdf]

| #   | ProbeID     | IgFC<br>F <sup>Arg</sup> - G <sup>Arg</sup> | pValue<br>F <sup>Arg</sup> : G <sup>Arg</sup> | TranscriptID | Alias      | Full name                                                                      |
|-----|-------------|---------------------------------------------|-----------------------------------------------|--------------|------------|--------------------------------------------------------------------------------|
| 1   | 261241_at   | 3.3                                         | 0.0000                                        | At1g32950    |            | Subtilase family protein                                                       |
| 2   | 263830_at   | 3.3                                         | 0.0092                                        | At2g40260    |            | Homeodomain-like superfamily protein                                           |
| 3   | 262812_at   | 3.3                                         | 0.0030                                        | At1g11690    |            | hypothetical protein                                                           |
| 4   | 251144_at   | 3.2                                         | 0.0015                                        | At5g01210    |            | HXXXD-type acyl-transferase family protein                                     |
| 5   | 246677_at   | 2.9                                         | 0.0049                                        | At5g32202    |            | putative protein                                                               |
| 6   | 265038_at   | 2.9                                         | 0.0040                                        | At1g03920    |            | Protein kinase family protein                                                  |
| 7   | 262680_at   | 2.8                                         | 0.0066                                        | At1g75880    |            | SGNH hydrolase-type esterase superfamily protein                               |
| 8   | 246675_at   | 2.8                                         | 0.0088                                        | At5g31411    |            | putative protein                                                               |
| 9   | 260290_at   | 2.8                                         | 0.0023                                        | At1g80510    |            | Transmembrane amino acid transporter family protein                            |
| 10  | 257440_at   | 2.8                                         | 0.0042                                        | At2g24880    |            | Plant self-incompatibility protein S1 family                                   |
| 11  | 255362_at   | 2.8                                         | 0.0035                                        | At4g04000    |            | transposable element gene                                                      |
| 12  | 259014_at   | 2.8                                         | 0.0015                                        | At3g07320    |            | O-Glycosyl hydrolases family 17 protein                                        |
| 13  | 262711_at   | 2.8                                         | 0.0008                                        | At1g16500    |            | hypothetical protein                                                           |
| 14  | 247340_at   | 2.8                                         | 0.0030                                        | At5g63700    |            | zinc ion binding;DNA binding                                                   |
| 15  | 262993_at   | 2.8                                         | 0.0100                                        | At1g54230    |            | Winged helix-turn-helix transcription repressor DNA-binding                    |
| 16  | 252105_at   | 2.8                                         | 0.0088                                        | At3g51470    |            | Protein phosphatase 2C family protein                                          |
| 17  | 263046_at   | 2.7                                         | 0.0003                                        | At2g05380    | GRP3S      | glycine-rich protein 3 short isoform                                           |
| 18  | 266969_at   | 2.7                                         | 0.0031                                        | At2g39540    |            | Gibberellin-regulated family protein                                           |
| 19  | 261715_at   | 2.6                                         | 0.0056                                        | At1g18485    |            | Pentatricopeptide repeat (PPR) superfamily protein                             |
| 20  | 265519_at   | 2.5                                         | 0.0038                                        | At2g06030    |            | hypothetical protein                                                           |
| 21  | 266766_at   | 2.5                                         | 0.0093                                        | At2g46880    | PAP14      | purple acid phosphatase 14                                                     |
| 22  | 263165_at   | 2.4                                         | 0.0083                                        | At1g03060    | SPI        | Beige/BEACH domain ;WD domain, G-beta repeat protein                           |
| 23  | 247617_at   | 2.4                                         | 0.0022                                        | At5g60270    |            | Concanavalin A-like lectin protein kinase family protein                       |
| 24  | 251261_at   | 2.4                                         | 0.0044                                        | At3g62110    |            | Pectin lyase-like superfamily protein                                          |
| 25  | 262223_at   | 2.4                                         | 0.0006                                        | At1g74680    |            | Exostosin family protein                                                       |
| 26  | 259789_at   | 2.4                                         | 0.0015                                        | At1g29395    | COR414-TM1 | COLD REGULATED 314 INNER MEMBRANE 1                                            |
| 27  | 254780_s_at | 2.4                                         | 0.0070                                        | At4g12770    |            | Chaperone DnaJ-domain superfamily protein                                      |
| 28  | 253054_at   | 2.3                                         | 0.0071                                        | At4g37580    | UNS2       | Acyl-CoA N-acyltransferases (NAT) superfamily protein                          |
| 29  | 264081_at   | 2.3                                         | 0.0017                                        | At2g28530    |            | putative RING zinc finger transcription negative regulator protein             |
| 30* | 248008_at   | 2.3                                         | 0.0054                                        | At5g56270    | WRKY2      | WRKY DNA-binding protein 2                                                     |
| 31  | 264665_at   | 2.2                                         | 0.0023                                        | At1g09670    |            | unknown protein                                                                |
| 32  | 245405_at   | 2.2                                         | 0.0034                                        | At4g17150    |            | alpha/beta-Hydrolases superfamily protein                                      |
| 33  | 250147_at   | 2.1                                         | 0.0056                                        | At5g14600    |            | S-adenosyl-L-methionine-dependent methyltransferases superfamily protein       |
| 34  | 266217_at   | 2.0                                         | 0.0017                                        | At2g28820    |            | unknown protein                                                                |
| 35  | 265248_at   | 2.0                                         | 0.0042                                        | At2g43010    | SRL2       | phytochrome interacting factor 4                                               |
| 36  | 252265_at   | 2.0                                         | 0.0006                                        | At3g49620    | DIN11      | 2-oxoglutarate (2OG) and Fe(II)-dependent oxygenase superfamily protein        |
| 37  | 250306_at   | 1.9                                         | 0.0011                                        | At5g12160    |            | putative protein                                                               |
| 38* | 256609_at   | 1.9                                         | 0.0076                                        | At3g30843    |            | transposable element gene                                                      |
| 39  | 267027_at   | 1.7                                         | 0.0096                                        | At2g38330    |            | MATE efflux family protein                                                     |
| 40  | 260304_at   | 1.7                                         | 0.0005                                        | At1g70480    |            | Domain of unknown function (DUF220)                                            |
| 41  | 246973_at   | 1.6                                         | 0.0038                                        | At5g24970    |            | Protein kinase superfamily protein                                             |
| 42  | 263867_at   | 1.6                                         | 0.0076                                        | At2g36830    | TIP1;1     | gamma tonoplast intrinsic protein                                              |
| 43  | 247047_at   | 1.6                                         | 0.0008                                        | At5g66650    |            | Protein of unknown function (DUF607)                                           |
| 44  | 257401_at   | 1.5                                         | 0.0026                                        | At1g23550    | SRO2       | similar to RCD one 2                                                           |
| 45  | 264524_at   | 1.4                                         | 0.0035                                        | At1g10070    | BCAT-2     | branched-chain amino acid transaminase 2                                       |
| 46  | 261551_at   | 1.4                                         | 0.0005                                        | At1g63440    | HMA5       | heavy metal atpase 5                                                           |
| 47  | 252825_at   | 1.4                                         | 0.0085                                        | At4g39890    | RABH1c     | RAB GTPase homolog H1C                                                         |
| 48  | 256548_at   | 1.4                                         | 0.0005                                        | At3g14770    | SWEET2     | Nodulin MtN3 family protein                                                    |
| 49  | 251050_at   | 1.3                                         | 0.0095                                        | At5g02440    |            | putative protein                                                               |
| 50  | 249916_at   | 1.3                                         | 0.0075                                        | At5g22880    | HTB2       | histone B2                                                                     |
| 51  | 267053_s_at | 1.3                                         | 0.0019                                        | At2g38390    |            | Peroxidase superfamily protein                                                 |
| 52  | 246076_at   | 1.2                                         | 0.0075                                        | At5g20280    | SPSA1      | sucrose phosphate synthase 1F                                                  |
| 53  | 259081_at   | 1.2                                         | 0.0063                                        | At3g05030    | NHX2       | sodium hydrogen exchanger 2                                                    |
| 54  | 259292_at   | 1.2                                         | 0.0018                                        | At3g11560    |            | LETM1-like protein                                                             |
| 55  | 263296_at   | 1.2                                         | 0.0001                                        | At2g38800    |            | Plant calmodulin-binding protein-related                                       |
| 56  | 264279_s_at | 1.2                                         | 0.0018                                        | At1g78820    |            | D-mannose binding lectin protein with Apple-like carbohydrate-binding domain   |
| 57  | 265387_at   | 1.1                                         | 0.0012                                        | At2g20670    |            | Protein of unknown function (DUF506)                                           |
| 58  | 249134_at   | 1.1                                         | 0.0077                                        | At5g43150    |            | unknown protein                                                                |
| 59  | 251905_at   | 1.1                                         | 0.0058                                        | At3g53710    | AGD6       | ARF-GAP domain 6                                                               |
| 60* | 258679_at   | 1.1                                         | 0.0047                                        | At3g08590    | iPGAM2     | Phosphoglycerate mutase, 2,3-bisphosphoglycerate-independent                   |
| 61  | 251438_s_at | 1.1                                         | 0.0090                                        | At3g59930    |            | putative protein                                                               |
| 62  | 249504_at   | 1.1                                         | 0.0003                                        | At5g38850    |            | Disease resistance protein (TIR-NBS-LRR class)                                 |
| 63  | 259910_at   | 1.1                                         | 0.0059                                        | At1g72700    |            | ATPase E1-E2 type family protein / haloacid dehalogenase-like hydrolase family |
| 64  | 253322_at   | 1.1                                         | 0.0036                                        | At4g33980    |            | putative protein                                                               |
| 65  | 261612_at   | 1.1                                         | 0.0026                                        | At1g49710    | FUT12      | fucosyltransferase 12                                                          |
| 66  | 260540_at   | 1.1                                         | 0.0091                                        | At2g43500    |            | Plant regulator RWP-RK family protein                                          |
| 67  | 262047_at   | 1.0                                         | 0.0040                                        | At1g80160    | GLY17      | Lactoylglutathione lyase / glyoxalase I family protein                         |
| 68  | 257621_at   | 1.0                                         | 0.0035                                        | At3g20410    | CPK9       | calmodulin-domain protein kinase 9                                             |
| 69  | 256526_at   | -1.0                                        | 0.0079                                        | At1g66090    |            | Disease resistance protein (TIR-NBS class)                                     |

|     |             |      |        |           |         |                                                                       |
|-----|-------------|------|--------|-----------|---------|-----------------------------------------------------------------------|
| 70  | 256964_at   | -1.0 | 0.0039 | At3g13520 | ATAGP12 | arabinogalactan protein 12                                            |
| 71  | 264923_s_at | -1.0 | 0.0093 | At1g60740 |         | Thioredoxin superfamily protein                                       |
| 72  | 256252_at   | -1.1 | 0.0071 | At3g11340 | UGT76B1 | UDP-Glycosyltransferase superfamily protein                           |
| 73  | 264264_at   | -1.1 | 0.0044 | At1g09250 |         | basic helix-loop-helix (bHLH) DNA-binding superfamily protein         |
| 74  | 251834_at   | -1.1 | 0.0001 | At3g55170 |         | Ribosomal L29 family protein                                          |
| 75  | 254088_at   | -1.1 | 0.0089 | At4g24880 |         | putative protein snurportin1 m3G-cap-specific nuclear import receptor |
| 76  | 255064_at   | -1.1 | 0.0007 | At4g08950 | EXO     | Phosphate-responsive 1 family protein                                 |
| 77  | 246274_at   | -1.1 | 0.0015 | At4g36620 | HANL2   | GATA transcription factor 19                                          |
| 78  | 245362_at   | -1.1 | 0.0013 | At4g17460 | HAT1    | Homeobox-leucine zipper protein 4 (HB-4) / HD-ZIP protein             |
| 79  | 251373_at   | -1.1 | 0.0014 | At3g60530 | GATA4   | GATA transcription factor 4                                           |
| 80  | 247189_at   | -1.2 | 0.0042 | At5g65390 | AGP7    | arabinogalactan protein 7                                             |
| 81  | 262230_at   | -1.2 | 0.0029 | At1g68560 | XYL1    | alpha-xylosidase 1                                                    |
| 82  | 258432_at   | -1.2 | 0.0007 | At3g16570 | RALF23  | rapid alkalization factor 23                                          |
| 83  | 250110_at   | -1.2 | 0.0019 | At5g15350 | ENODL17 | early nodulin-like protein 17                                         |
| 84  | 255230_at   | -1.2 | 0.0008 | At4g05390 | RFNR1   | root FNR 1                                                            |
| 85  | 246486_at   | -1.3 | 0.0074 | At5g15910 |         | NAD(P)-binding Rossmann-fold superfamily protein                      |
| 86  | 257322_at   | -1.3 | 0.0059 | orf111b   |         | hypothetical protein                                                  |
| 87  | 250316_at   | -1.3 | 0.0029 | At5g12140 | CYS1    | cystatin-1                                                            |
| 88  | 258920_at   | -1.4 | 0.0061 | At3g10520 | NSHB2   | haemoglobin 2                                                         |
| 89  | 255447_at   | -1.4 | 0.0022 | At4g02790 | EMB3129 | GTP-binding family protein                                            |
| 90  | 260371_at   | -1.4 | 0.0089 | At1g69690 | TCP15   | TCP family transcription factor                                       |
| 91  | 251442_at   | -1.5 | 0.0029 | At3g59980 |         | Nucleic acid-binding, OB-fold-like protein                            |
| 92  | 261199_at   | -1.5 | 0.0016 | At1g12950 | RSH2    | root hair specific 2                                                  |
| 93  | 259727_at   | -1.5 | 0.0051 | At1g60950 | FED A   | 2Fe-2S ferredoxin-like superfamily protein                            |
| 94  | 246550_at   | -1.6 | 0.0006 | At5g14920 |         | Gibberellin-regulated family protein                                  |
| 95  | 255433_at   | -1.9 | 0.0010 | At4g03210 | XTH9    | xyloglucan endotransglucosylase/hydrolase 9                           |
| 96  | 259645_at   | -1.9 | 0.0048 | At1g69010 | BIM2    | BES1-interacting Myc-like protein 2                                   |
| 97  | 252741_at   | -1.9 | 0.0020 | At3g43280 |         | putative protein                                                      |
| 98  | 266215_at   | -1.9 | 0.0046 | At2g06850 | XTH4    | xyloglucan endotransglucosylase/hydrolase 4                           |
| 99  | 250928_at   | -2.1 | 0.0049 | At5g03280 | PIR2    | NRAMP metal ion transporter family protein                            |
| 100 | 253168_at   | -2.1 | 0.0091 | At4g35070 |         | SBP (S-ribonuclease binding protein) family protein                   |
| 101 | 257701_at   | -2.2 | 0.0008 | At3g12710 |         | DNA glycosylase superfamily protein                                   |
| 102 | 252801_at   | -2.2 | 0.0052 | At3g42340 |         | transposable element gene                                             |
| 103 | 258996_at   | -2.2 | 0.0046 | At3g01800 |         | Ribosome recycling factor                                             |
| 104 | 251995_at   | -2.3 | 0.0066 | At3g52940 | HYD2    | Ergosterol biosynthesis ERG4/ERG24 family                             |
| 105 | 259208_at   | -2.3 | 0.0032 | At3g09060 |         | Pentatricopeptide repeat (PPR) superfamily protein                    |
| 106 | 267279_at   | -2.4 | 0.0100 | At2g19460 |         | Protein of unknown function (DUF3511)                                 |
| 107 | 252097_at   | -2.4 | 0.0048 | At3g51090 |         | Protein of unknown function (DUF1640)                                 |
| 108 | 249562_at   | -2.5 | 0.0026 | At5g38350 |         | Disease resistance protein (NBS-LRR class) family                     |
| 109 | 252397_at   | -2.5 | 0.0007 | At3g47980 |         | Integral membrane HPP family protein                                  |
| 110 | 254198_at   | -2.6 | 0.0073 | At4g24090 |         | hypothetical protein                                                  |
| 111 | 253177_s_at | -2.6 | 0.0051 | At4g35150 |         | O-methyltransferase family protein                                    |
| 112 | 244947_at   | -2.6 | 0.0050 | orf121a   |         | hypothetical protein                                                  |
| 113 | 266035_at   | -2.6 | 0.0000 | At2g05990 | MOD1    | NAD(P)-binding Rossmann-fold superfamily protein                      |
| 114 | 260911_at   | -2.6 | 0.0041 | At1g02490 |         | hypothetical protein                                                  |
| 115 | 259581_at   | -2.8 | 0.0066 | At1g28040 |         | RING/U-box superfamily protein                                        |
| 116 | 266857_at   | -2.9 | 0.0002 | At2g26900 | BASS2   | Sodium Bile acid symporter family                                     |
| 117 | 266054_at   | -2.9 | 0.0007 | At2g40640 |         | RING/U-box superfamily protein                                        |
| 118 | 262475_at   | -2.9 | 0.0032 | At1g50340 |         | Plant invertase/pectin methylesterase inhibitor superfamily protein   |
| 119 | 255730_at   | -2.9 | 0.0078 | At1g25460 |         | NAD(P)-binding Rossmann-fold superfamily protein                      |
| 120 | 247725_at   | -2.9 | 0.0002 | At5g59410 |         | Rab5-interacting family protein                                       |
| 121 | 248233_at   | -2.9 | 0.0025 | At5g53840 |         | F-box/RNI-like/FBD-like domains-containing protein                    |
| 122 | 257173_at   | -2.9 | 0.0002 | At3g23810 | SAHH2   | S-adenosyl-L-homocysteine (SAH) hydrolase 2                           |
| 123 | 264114_at   | -3.2 | 0.0015 | At2g31270 | CDT1A   | homolog of yeast CDT1 A                                               |
| 124 | 251401_at   | -3.2 | 0.0038 | At3g60270 |         | Cupredoxin superfamily protein                                        |
| 125 | 264204_at   | -3.3 | 0.0025 | At1g22710 | SUT1    | sucrose-proton symporter 2                                            |
| 126 | 256859_at   | -3.4 | 0.0014 | At3g22940 |         | F-box associated ubiquitination effector family protein               |
| 127 | 259753_at   | -3.5 | 0.0027 | At1g71050 | HIPP20  | Heavy metal transport/detoxification superfamily protein              |
| 128 | 245354_at   | -3.6 | 0.0007 | At4g17600 | LIL3:1  | Chlorophyll A-B binding family protein                                |
| 129 | 251344_at   | -3.8 | 0.0006 | At3g60920 |         | putative protein potassium channel regulator 1                        |
| 130 | 251048_at   | -4.0 | 0.0005 | At5g02410 | ALG10   | DIE2/ALG10 family                                                     |
