# Supplementary material
Source: PubMed Central journal article supplement (PMC8024390)
Supplement: Table_S3.pdf [file Table_S3.pdf]

| #  | ProbeID     | IgFC<br>G <sup>Arg</sup> - G <sup>WT</sup> | pValue<br>G <sup>Arg</sup> - G <sup>WT</sup> | TranscriptID | Alias     | Full name                                                                   |
|----|-------------|--------------------------------------------|----------------------------------------------|--------------|-----------|-----------------------------------------------------------------------------|
| 1  | 246816_at   | 3.2                                        | 0.0000                                       | At5g27230    |           | Frigida-like protein                                                        |
| 2  | 257593_at   | 3.1                                        | 0.0065                                       | At3g24840    |           | Sec14p-like phosphatidylinositol transfer family protein                    |
| 3  | 254419_at   | 2.9                                        | 0.0022                                       | At4g21490    | NDB3      | NAD(P)H dehydrogenase B3                                                    |
| 4  | 261020_at   | 2.8                                        | 0.0080                                       | At1g26390    |           | FAD-binding Berberine family protein                                        |
| 5  | 251401_at   | 2.8                                        | 0.0068                                       | At3g60270    |           | Cupredoxin superfamily protein                                              |
| 6  | 261325_at   | 2.7                                        | 0.0094                                       | At1g44780    |           | hypothetical protein                                                        |
| 7  | 254344_at   | 2.7                                        | 0.0093                                       | At4g22110    |           | GroES-like zinc-binding dehydrogenase family protein                        |
| 8  | 264994_at   | 2.7                                        | 0.0077                                       | At1g67270    |           | Zinc-finger domain of monoamine-oxidase A repressor R1 protein              |
| 9  | 259656_at   | 2.7                                        | 0.0053                                       | At1g55200    |           | Protein kinase protein with adenine nucleotide alpha hydrolases-like domain |
| 10 | 256080_at   | 2.7                                        | 0.0097                                       | At1g20690    |           | SWI-SNF-related chromatin binding protein                                   |
| 11 | 255516_at   | 2.5                                        | 0.0095                                       | At4g02270    | RHS13     | root hair specific 13                                                       |
| 12 | 260158_at   | 2.5                                        | 0.0087                                       | At1g79910    |           | Regulator of Vps4 activity in the MVB pathway protein                       |
| 13 | 266442_at   | 2.5                                        | 0.0002                                       | At2g43260    |           | F-box and associated interaction domains-containing protein                 |
| 14 | 248510_at   | 2.5                                        | 0.0082                                       | At5g50315    |           | transposable element gene                                                   |
| 15 | 261452_s_at | 2.5                                        | 0.0028                                       | At1g21020    |           | transposable element gene                                                   |
| 16 | 255383_at   | 2.5                                        | 0.0001                                       | At4g03570    |           | Cystatin/monellin superfamily protein                                       |
| 17 | 252834_at   | 2.4                                        | 0.0062                                       | At4g40070    |           | RING/U-box superfamily protein                                              |
| 18 | 263926_at   | 2.4                                        | 0.0072                                       | At2g21800    | EME1A     | essential meiotic endonuclease 1A                                           |
| 19 | 248899_at   | 2.4                                        | 0.0081                                       | At5g46390    |           | Peptidase S41 family protein                                                |
| 20 | 251302_at   | 2.3                                        | 0.0004                                       | At3g61970    | NGA2      | AP2/B3-like transcriptional factor family protein                           |
| 21 | 256364_at   | 2.3                                        | 0.0087                                       | At1g66550    | WRKY67    | WRKY DNA-binding protein 67                                                 |
| 22 | 249677_at   | 2.3                                        | 0.0061                                       | At5g35970    |           | P-loop containing nucleoside triphosphate hydrolases superfamily protein    |
| 23 | 248600_at   | 2.3                                        | 0.0046                                       | At5g49390    |           | putative protein                                                            |
| 24 | 260911_at   | 2.2                                        | 0.0094                                       | At1g02490    |           | hypothetical protein                                                        |
| 25 | 263219_at   | 2.1                                        | 0.0076                                       | At1g30600    |           | Subtilase family protein                                                    |
| 26 | 252097_at   | 2.1                                        | 0.0084                                       | At3g51090    |           | Protein of unknown function (DUF1640)                                       |
| 27 | 250070_at   | 2.0                                        | 0.0068                                       | At5g17980    |           | C2 calcium/lipid-binding plant phosphoribosyltransferase family protein     |
| 28 | 262786_at   | 2.0                                        | 0.0022                                       | At1g10740    |           | alpha/beta-Hydrolases superfamily protein                                   |
| 29 | 251980_at   | 1.8                                        | 0.0059                                       | At3g53270    |           | Small nuclear RNA activating complex (SNAPc), subunit SNAP43 protein        |
| 30 | 248133_at   | 1.8                                        | 0.0053                                       | At5g54850    |           | unknown protein                                                             |
| 31 | 259727_at   | 1.7                                        | 0.0015                                       | At1g60950    | FED A     | 2Fe-2S ferredoxin-like superfamily protein                                  |
| 32 | 262826_at   | 1.7                                        | 0.0051                                       | At1g13080    | CYP71B2   | cytochrome P450, family 71, subfamily B, polypeptide 2                      |
| 33 | 261071_at   | 1.6                                        | 0.0065                                       | At1g07380    |           | Neutral/alkaline non-lysosomal ceramidase                                   |
| 34 | 246486_at   | 1.6                                        | 0.0010                                       | At5g15910    |           | NAD(P)-binding Rossmann-fold superfamily protein                            |
| 35 | 267392_at   | 1.4                                        | 0.0049                                       | At2g44490    | PEN2      | Glycosyl hydrolase superfamily protein                                      |
| 36 | 267197_at   | 1.4                                        | 0.0077                                       | At2g30960    |           | hypothetical protein                                                        |
| 37 | 247936_at   | 1.1                                        | 0.0092                                       | At5g57030    | LUT2      | Lycopene beta/epsilon cyclase protein                                       |
| 38 | 254847_at   | 1.1                                        | 0.0047                                       | At4g11850    | PLDGAMMA1 | phospholipase D gamma 1                                                     |
| 39 | 260540_at   | -1.0                                       | 0.0082                                       | At2g43500    |           | Plant regulator RWP-RK family protein                                       |
| 40 | 261859_at   | -1.1                                       | 0.0050                                       | At1g50490    | UBC20     | ubiquitin-conjugating enzyme 20                                             |
| 41 | 266117_at   | -1.2                                       | 0.0017                                       | At2g02170    |           | Remorin family protein                                                      |
| 42 | 248338_at   | -1.2                                       | 0.0059                                       | At5g52440    | HCF106    | Bacterial sec-independent translocation protein mttA/Hcf106                 |
| 43 | 249452_at   | -1.3                                       | 0.0020                                       | At5g39500    | GNL1      | GNOM-like 1                                                                 |
| 44 | 264833_at   | -1.3                                       | 0.0039                                       | At1g03590    |           | Protein phosphatase 2C family protein                                       |
| 45 | 267359_at   | -1.4                                       | 0.0028                                       | At2g40020    |           | Nucleolar histone methyltransferase-related protein                         |
| 46 | 263995_at   | -1.4                                       | 0.0032                                       | At2g22540    | SVP       | K-box region and MADS-box transcription factor family protein               |
| 47 | 250306_at   | -1.4                                       | 0.0086                                       | At5g12160    |           | putative protein                                                            |
| 48 | 249115_at   | -1.5                                       | 0.0069                                       | At5g43810    | ZLL       | Stabilizer of iron transporter SufD / Polynucleotidyl transferase           |
| 49 | 253581_at   | -1.5                                       | 0.0082                                       | At4g30660    |           | Low temperature and salt responsive protein family                          |
| 50 | 251665_at   | -1.5                                       | 0.0087                                       | At3g57040    | ATRR4     | response regulator 9                                                        |
| 51 | 260304_at   | -1.6                                       | 0.0005                                       | At1g70480    |           | Domain of unknown function (DUF220)                                         |
| 52 | 256611_at   | -1.6                                       | 0.0088                                       | At3g29270    |           | RING/U-box superfamily protein                                              |
| 53 | 251375_at   | -1.6                                       | 0.0025                                       | At3g60410    |           | Protein of unknown function (DUF1639)                                       |
| 54 | 263867_at   | -1.6                                       | 0.0051                                       | At2g36830    | TIP1;1    | gamma tonoplast intrinsic protein                                           |
| 55 | 264665_at   | -1.7                                       | 0.0092                                       | At1g09670    |           | unknown protein                                                             |
| 56 | 245404_at   | -1.7                                       | 0.0096                                       | At4g17610    |           | tRNA/rRNA methyltransferase (SpoU) family protein                           |
| 57 | 265248_at   | -1.8                                       | 0.0061                                       | At2g43010    | SRL2      | phytochrome interacting factor 4                                            |
| 58 | 246973_at   | -1.8                                       | 0.0012                                       | At5g24970    |           | Protein kinase superfamily protein                                          |
| 59 | 251050_at   | -1.8                                       | 0.0004                                       | At5g02440    |           | putative protein                                                            |
| 60 | 267027_at   | -1.9                                       | 0.0028                                       | At2g38330    |           | MATE efflux family protein                                                  |
| 61 | 262223_at   | -1.9                                       | 0.0025                                       | At1g74680    |           | Exostosin family protein                                                    |
| 62 | 259795_at   | -2.0                                       | 0.0080                                       | At1g64290    |           | F-box protein-related                                                       |
| 63 | 245405_at   | -2.1                                       | 0.0025                                       | At4g17150    |           | alpha/beta-Hydrolases superfamily protein                                   |
| 64 | 263068_at   | -2.2                                       | 0.0070                                       | At2g17580    |           | Polynucleotide adenyltransferase family protein                             |
| 65 | 259014_at   | -2.2                                       | 0.0065                                       | At3g07320    |           | O-Glycosyl hydrolases family 17 protein                                     |
| 66 | 257274_at   | -2.2                                       | 0.0057                                       | At3g14510    |           | Polyprenyl synthetase family protein                                        |
| 67 | 260047_at   | -2.3                                       | 0.0092                                       | At1g73740    |           | UDP-Glycosyltransferase superfamily protein                                 |
| 68 | 261241_at   | -2.3                                       | 0.0012                                       | At1g32950    |           | Subtilase family protein                                                    |
| 69 | 255513_at   | -2.3                                       | 0.0055                                       | At4g02060    | PRL       | Minichromosome maintenance (MCM2/3/5) family protein                        |

|    |             |      |        |           |         |                                                                    |
|----|-------------|------|--------|-----------|---------|--------------------------------------------------------------------|
| 70 | 264081_at   | -2.3 | 0.0009 | At2g28530 |         | putative RING zinc finger transcription negative regulator protein |
| 71 | 260519_at   | -2.4 | 0.0093 | At1g51540 |         | Galactose oxidase/kelch repeat superfamily protein                 |
| 72 | 248658_at   | -2.5 | 0.0021 | At5g48600 | SMC3    | structural maintenance of chromosome 3                             |
| 73 | 263046_at   | -2.5 | 0.0004 | At2g05380 | GRP3S   | glycine-rich protein 3 short isoform                               |
| 74 | 250888_at   | -2.5 | 0.0027 | At5g04460 |         | RING/U-box superfamily protein                                     |
| 75 | 263447_s_at | -2.5 | 0.0045 | At2g31640 |         | putative PHD-type zinc finger protein                              |
| 76 | 251144_at   | -2.6 | 0.0052 | At5g01210 |         | HXXXD-type acyl-transferase family protein                         |
| 77 | 258277_at   | -2.6 | 0.0029 | At3g26830 | PAD3    | Cytochrome P450 superfamily protein                                |
| 78 | 246675_at   | -2.7 | 0.0091 | At5g31411 |         | putative protein                                                   |
| 79 | 267201_at   | -2.7 | 0.0015 | At2g31010 |         | Protein kinase superfamily protein                                 |
| 80 | 262449_at   | -2.7 | 0.0075 | At1g11160 |         | Transducin/WD40 repeat-like superfamily protein                    |
| 81 | 249612_at   | -2.8 | 0.0038 | At5g37290 |         | ARM repeat superfamily protein                                     |
| 82 | 247072_at   | -2.8 | 0.0080 | At5g66490 |         | putative protein                                                   |
| 83 | 250859_at   | -2.8 | 0.0035 | At5g04660 | CYP77A4 | cytochrome P450, family 77, subfamily A, polypeptide 4             |
| 84 | 257440_at   | -2.8 | 0.0027 | At2g24880 |         | Plant self-incompatibility protein S1 family                       |
| 85 | 256374_at   | -2.9 | 0.0005 | At1g66730 | LIG6    | DNA LIGASE 6                                                       |
| 86 | 263964_at   | -3.0 | 0.0021 | At2g12880 |         | Zinc knuckle (CCHC-type) family protein                            |
| 87 | 262388_at   | -3.1 | 0.0089 | At1g49320 | USPL1   | unknown seed protein like 1                                        |
| 88 | 262993_at   | -3.1 | 0.0031 | At1g54230 |         | Winged helix-turn-helix transcription repressor DNA-binding        |
| 89 | 262871_at   | -3.1 | 0.0006 | At1g65010 |         | Plant protein of unknown function (DUF827)                         |
| 90 | 247340_at   | -3.6 | 0.0002 | At5g63700 |         | zinc ion binding;DNA binding                                       |
