# Supplementary material
Source: PubMed Central journal article supplement (PMC8024390)
Supplement: Table_S4.pdf [file Table_S4.pdf]

| #  | ProbeID     | IgFC<br>$F_{ARG} - F_{WT}$ | pValue<br>$F_{ARG} - F_{WT}$ | TranscriptID | Alias   | Full name                                                                |
|----|-------------|----------------------------|------------------------------|--------------|---------|--------------------------------------------------------------------------|
| 1  | 266850_at   | 3.9                        | 0.0011                       | At2g26850    |         | F-box family protein                                                     |
| 2  | 246671_at   | 3.8                        | 0.0003                       | At5g30820    |         | putative protein                                                         |
| 3  | 247773_at   | 3.2                        | 0.0026                       | At5g58630    |         | putative protein                                                         |
| 4  | 266634_at   | 3.0                        | 0.0027                       | At2g35530    | bZIP16  | basic region/leucine zipper transcription factor 16                      |
| 5  | 249622_at   | 2.9                        | 0.0055                       | At5g37550    |         | putative protein                                                         |
| 6  | 249968_at   | 2.9                        | 0.0032                       | At5g19070    |         | SNARE associated Golgi protein family                                    |
| 7  | 259812_at   | 2.7                        | 0.0005                       | At1g49840    |         | Protein of unknown function (DUF620)                                     |
| 8  | 257796_at   | 2.6                        | 0.0087                       | At3g15930    |         | Pentatricopeptide repeat (PPR) superfamily protein                       |
| 9  | 264136_at   | 2.6                        | 0.0003                       | At1g78980    | SRF5    | STRUBBELIG-receptor family 5                                             |
| 10 | 261466_at   | 2.6                        | 0.0032                       | At1g07690    |         | hypothetical protein                                                     |
| 11 | 259166_at   | 2.6                        | 0.0066                       | At3g01670    | SEOa    | unknown protein                                                          |
| 12 | 257650_at   | 2.5                        | 0.0055                       | At3g16800    |         | Protein phosphatase 2C family protein                                    |
| 13 | 248004_at   | 2.5                        | 0.0066                       | At5g56230    | PRA1.G2 | prenylated RAB acceptor 1.G2                                             |
| 14 | 266525_at   | 2.4                        | 0.0080                       | At2g16970    | MEE15   | Major facilitator superfamily protein                                    |
| 15 | 246079_at   | 2.4                        | 0.0063                       | At5g20450    |         | putative protein unconventional myosin heavy chain                       |
| 16 | 266969_at   | 2.4                        | 0.0046                       | At2g39540    |         | Gibberellin-regulated family protein                                     |
| 17 | 261894_at   | 2.4                        | 0.0045                       | At1g80900    | MRS2-10 | magnesium transporter 1                                                  |
| 18 | 252265_at   | 2.3                        | 0.0001                       | At3g49620    | DIN11   | 2-oxoglutarate (2OG) and Fe(II)-dependent oxygenase superfamily protein  |
| 19 | 267091_at   | 2.3                        | 0.0077                       | At2g38185    |         | RING/U-box superfamily protein                                           |
| 20 | 259214_at   | 2.3                        | 0.0033                       | At3g09085    |         | Protein of unknown function (DUF962)                                     |
| 21 | 264482_at   | 2.2                        | 0.0086                       | At1g77210    | STP14   | sugar transporter 14                                                     |
| 22 | 264151_at   | 2.0                        | 0.0051                       | At1g02070    |         | hypothetical protein                                                     |
| 23 | 252204_at   | 1.9                        | 0.0042                       | At3g50340    |         | putative protein                                                         |
| 24 | 247047_at   | 1.7                        | 0.0002                       | At5g66650    |         | Protein of unknown function (DUF607)                                     |
| 25 | 252632_s_at | 1.6                        | 0.0027                       | At3g44480    | RPP1    | Disease resistance protein (TIR-NBS-LRR class) family                    |
| 26 | 254137_at   | 1.6                        | 0.0061                       | At4g24930    |         | thylakoid luminal 17.9 kDa protein, chloroplast                          |
| 27 | 264814_at   | 1.6                        | 0.0019                       | At2g17900    | SDG37   | SET domain group 37                                                      |
| 28 | 261162_at   | 1.5                        | 0.0060                       | At1g34440    |         | hypothetical protein                                                     |
| 29 | 246251_at   | 1.5                        | 0.0011                       | At4g37220    |         | Cold acclimation protein WCOR413 family                                  |
| 30 | 255582_at   | 1.5                        | 0.0098                       | At4g01500    | NGA4    | AP2/B3-like transcriptional factor family protein                        |
| 31 | 264777_at   | 1.4                        | 0.0028                       | At1g08630    | THA1    | threonine aldolase 1                                                     |
| 32 | 251969_at   | 1.4                        | 0.0080                       | At3g53130    | LUT1    | Cytochrome P450 superfamily protein                                      |
| 33 | 266064_at   | 1.4                        | 0.0082                       | At2g18780    |         | F-box and associated interaction domains-containing protein              |
| 34 | 246010_at   | 1.4                        | 0.0086                       | At5g08440    |         | putative protein                                                         |
| 35 | 247324_at   | 1.4                        | 0.0081                       | At5g64190    |         | putative protein                                                         |
| 36 | 253161_at   | 1.4                        | 0.0097                       | At4g35770    | SEN1    | Rhodanese/Cell cycle control phosphatase superfamily protein             |
| 37 | 266440_at   | 1.3                        | 0.0074                       | At2g43240    |         | Nucleotide-sugar transporter family protein                              |
| 38 | 263112_at   | 1.3                        | 0.0070                       | At1g03080    |         | kinase interacting (KIP1-like) family protein                            |
| 39 | 262279_at   | 1.3                        | 0.0089                       | At1g68630    |         | PLAC8 family protein                                                     |
| 40 | 245905_at   | 1.3                        | 0.0001                       | At5g11090    |         | serine-rich protein-related                                              |
| 41 | 257401_at   | 1.2                        | 0.0080                       | At1g23550    | SRO2    | similar to RCD one 2                                                     |
| 42 | 264032_at   | 1.2                        | 0.0001                       | At2g03800    | GEK1    | D-aminoacyl-tRNA deacylases                                              |
| 43 | 263295_at   | 1.2                        | 0.0050                       | At2g14210    | ANR1    | AGAMOUS-like 44                                                          |
| 44 | 267359_at   | 1.1                        | 0.0098                       | At2g40020    |         | Nucleolar histone methyltransferase-related protein                      |
| 45 | 252367_at   | 1.1                        | 0.0010                       | At3g48360    | BT2     | BTB and TAZ domain protein 2                                             |
| 46 | 252234_at   | 1.0                        | 0.0046                       | At3g49780    | PSK4    | phytosulfokine 4 precursor                                               |
| 47 | 265387_at   | 1.0                        | 0.0018                       | At2g20670    |         | Protein of unknown function (DUF506)                                     |
| 48 | 263164_at   | 1.0                        | 0.0007                       | At1g03070    |         | Bax inhibitor-1 family protein                                           |
| 49 | 260923_at   | 1.0                        | 0.0020                       | At1g21570    |         | glycine-rich RNA-binding protein grp1a, putative                         |
| 50 | 256965_at   | 1.0                        | 0.0039                       | At3g13450    | DIN4    | Transketolase family protein                                             |
| 51 | 266595_at   | 1.0                        | 0.0016                       | At2g46180    | GC4     | golgin candidate 4                                                       |
| 52 | 266223_at   | -1.0                       | 0.0053                       | At2g28790    |         | Pathogenesis-related thaumatin superfamily protein                       |
| 53 | 263977_at   | -1.0                       | 0.0059                       | At2g42660    |         | Homeodomain-like superfamily protein                                     |
| 54 | 247052_at   | -1.0                       | 0.0003                       | At5g66700    | HB53    | homeobox 53                                                              |
| 55 | 254088_at   | -1.1                       | 0.0086                       | At4g24880    |         | putative protein snurportin1 m3G-cap-specific nuclear import receptor    |
| 56 | 245362_at   | -1.1                       | 0.0014                       | At4g17460    | HAT1    | Homeobox-leucine zipper protein 4 (HB-4) / HD-ZIP protein                |
| 57 | 251442_at   | -1.2                       | 0.0093                       | At3g59980    |         | Nucleic acid-binding, OB-fold-like protein                               |
| 58 | 256512_at   | -1.2                       | 0.0024                       | At1g33265    |         | Transmembrane proteins 14C                                               |
| 59 | 246842_at   | -1.2                       | 0.0081                       | At5g26731    |         | Expressed protein                                                        |
| 60 | 255433_at   | -1.4                       | 0.0075                       | At4g03210    | XTH9    | xyloglucan endotransglucosylase/hydrolase 9                              |
| 61 | 262230_at   | -1.4                       | 0.0004                       | At1g68560    | XYL1    | alpha-xylosidase 1                                                       |
| 62 | 255447_at   | -1.4                       | 0.0014                       | At4g02790    | EMB3129 | GTP-binding family protein                                               |
| 63 | 255718_at   | -1.4                       | 0.0077                       | At1g32070    | NSI     | nuclear shuttle interacting                                              |
| 64 | 254318_at   | -1.4                       | 0.0009                       | At4g22530    |         | S-adenosyl-L-methionine-dependent methyltransferases superfamily protein |
| 65 | 253056_at   | -1.5                       | 0.0076                       | At4g37650    | SHR     | GRAS family transcription factor                                         |
| 66 | 260010_at   | -1.6                       | 0.0016                       | At1g68020    | TPS6    | UDP-Glycosyltransferase / trehalose-phosphatase family protein           |
| 67 | 263360_at   | -1.6                       | 0.0012                       | At2g03830    | RGF8    | unknown protein                                                          |
| 68 | 255921_at   | -1.6                       | 0.0070                       | At1g22240    | PUM8    | pumilio 8                                                                |
| 69 | 253063_at   | -1.7                       | 0.0026                       | At4g37640    | ACA2    | calcium ATPase 2                                                         |

|     |             |      |        |           |         |                                                                          |
|-----|-------------|------|--------|-----------|---------|--------------------------------------------------------------------------|
| 70  | 265252_at   | -1.8 | 0.0093 | At2g01980 | SOS1    | sodium proton exchanger, putative (NHX7) (SOS1)                          |
| 71  | 263129_at   | -1.8 | 0.0086 | At1g78620 |         | Protein of unknown function DUF92, transmembrane                         |
| 72  | 248610_at   | -1.8 | 0.0035 | At5g49500 |         | Signal recognition particle, SRP54 subunit protein                       |
| 73  | 250928_at   | -1.8 | 0.0098 | At5g03280 | PIR2    | NRAMP metal ion transporter family protein                               |
| 74  | 257173_at   | -1.8 | 0.0062 | At3g23810 | SAHH2   | S-adenosyl-l-homocysteine (SAH) hydrolase 2                              |
| 75  | 252397_at   | -1.8 | 0.0062 | At3g47980 |         | Integral membrane HPP family protein                                     |
| 76  | 266035_at   | -2.0 | 0.0004 | At2g05990 | MOD1    | NAD(P)-binding Rossmann-fold superfamily protein                         |
| 77  | 261825_at   | -2.0 | 0.0058 | At1g11545 | XTH8    | xyloglucan endotransglucosylase/hydrolase 8                              |
| 78  | 247872_at   | -2.0 | 0.0098 | At5g57680 |         | putative protein                                                         |
| 79  | 266215_at   | -2.0 | 0.0021 | At2g06850 | XTH4    | xyloglucan endotransglucosylase/hydrolase 4                              |
| 80  | 251304_at   | -2.1 | 0.0099 | At3g61990 | OMTF3   | S-adenosyl-L-methionine-dependent methyltransferases superfamily protein |
| 81  | 253199_at   | -2.1 | 0.0087 | At4g35410 |         | Clathrin adaptor complex small chain family protein                      |
| 82  | 257701_at   | -2.2 | 0.0006 | At3g12710 |         | DNA glycosylase superfamily protein                                      |
| 83  | 251685_at   | -2.2 | 0.0049 | At3g56430 |         | putative protein                                                         |
| 84  | 251209_at   | -2.2 | 0.0030 | At3g62890 |         | Pentatricopeptide repeat (PPR) superfamily protein                       |
| 85  | 257091_at   | -2.3 | 0.0080 | At3g20540 | PolIB   | polymerase gamma 1                                                       |
| 86  | 248157_at   | -2.3 | 0.0084 | At5g54420 |         | Protein of unknown function (DUF295)                                     |
| 87  | 255943_at   | -2.3 | 0.0082 | At1g22370 | UGT85A5 | UDP-glucosyl transferase 85A5                                            |
| 88  | 262475_at   | -2.3 | 0.0096 | At1g50340 |         | Plant invertase/pectin methylesterase inhibitor superfamily protein      |
| 89  | 253177_s_at | -2.3 | 0.0071 | At4g35150 |         | O-methyltransferase family protein                                       |
| 90  | 266758_at   | -2.4 | 0.0010 | At2g46920 | POL     | Protein phosphatase 2C family protein                                    |
| 91  | 258996_at   | -2.4 | 0.0019 | At3g01800 |         | Ribosome recycling factor                                                |
| 92  | 265335_at   | -2.4 | 0.0094 | At2g18245 |         | alpha/beta-Hydrolases superfamily protein                                |
| 93  | 264698_at   | -2.4 | 0.0015 | At1g70200 |         | RNA-binding (RRM/RBD/RNP motifs) family protein                          |
| 94  | 265918_at   | -2.5 | 0.0087 | At2g15090 | KCS8    | 3-ketoacyl-CoA synthase 8                                                |
| 95  | 266470_at   | -2.6 | 0.0050 | At2g31080 |         | transposable element gene                                                |
| 96  | 264453_at   | -2.6 | 0.0051 | At1g10300 |         | Nucleolar GTP-binding protein                                            |
| 97  | 245623_s_at | -2.8 | 0.0066 | At4g14103 |         | F-box/RNI-like superfamily protein                                       |
| 98  | 266837_x_at | -2.8 | 0.0094 | At2g25990 |         | unknown protein                                                          |
| 99  | 266857_at   | -2.9 | 0.0001 | At2g26900 | BASS2   | Sodium Bile acid symporter family                                        |
| 100 | 264204_at   | -2.9 | 0.0046 | At1g22710 | SUT1    | sucrose-proton symporter 2                                               |
| 101 | 264677_at   | -2.9 | 0.0024 | At1g09700 | HYL1    | dsRNA-binding domain-like superfamily protein                            |
| 102 | 251048_at   | -3.0 | 0.0043 | At5g02410 | ALG10   | DIE2/ALG10 family                                                        |
| 103 | 246800_at   | -3.0 | 0.0088 | At5g26780 | SHM2    | serine hydroxymethyltransferase 2                                        |
| 104 | 266054_at   | -3.1 | 0.0002 | At2g40640 |         | RING/U-box superfamily protein                                           |
| 105 | 264353_at   | -3.2 | 0.0081 | At1g03260 |         | SNARE associated Golgi protein family                                    |
| 106 | 261653_at   | -3.3 | 0.0021 | At1g01900 | SBT1.1  | subtilase family protein                                                 |
| 107 | 251344_at   | -3.9 | 0.0003 | At3g60920 |         | putative protein beige-like protein (CDC4L) - Homo sapiens               |
