# Supplementary material
Source: PubMed Central journal article supplement (PMC8024390)
Supplement: Table_S5.pdf [file Table_S5.pdf]

|    |           |      |        |      |        |     |        |      |        |           |       |                                            |
|----|-----------|------|--------|------|--------|-----|--------|------|--------|-----------|-------|--------------------------------------------|
| 52 | 262388_at | -3.1 | 0.0089 | -1.6 | 0.1266 | 1.9 | 0.0978 | 0.5  | 0.6701 | At1g49320 | USPL1 | unknown seed protein like 1                |
| 53 | 262871_at | -3.1 | 0.0006 | -0.4 | 0.5613 | 2.2 | 0.0128 | -0.5 | 0.5294 | At1g65010 |       | Plant protein of unknown function (DUF827) |
