# Supplementary material
Source: PubMed Central journal article supplement (PMC8024390)
Supplement: Table_S6.pdf [file Table_S6.pdf]

|    | ProbelD     | IgFC<br>F <sup>Arg</sup> :G <sup>Arg</sup> | pValue<br>F <sup>Arg</sup> :G <sup>Arg</sup> | IgFC<br>F <sup>WT</sup> :G <sup>WT</sup> | pValue<br>F <sup>WT</sup> :G <sup>WT</sup> | IgFC<br>G <sup>Arg</sup> :G <sup>WT</sup> | pValue<br>G <sup>Arg</sup> :G <sup>WT</sup> | IgFC<br>F <sup>Arg</sup> :F <sup>WT</sup> | pValue<br>F <sup>Arg</sup> :F <sup>WT</sup> | TranscriptID | Alias    | Full name                                                     |
|----|-------------|--------------------------------------------|----------------------------------------------|------------------------------------------|--------------------------------------------|-------------------------------------------|---------------------------------------------|-------------------------------------------|---------------------------------------------|--------------|----------|---------------------------------------------------------------|
| 1  | 248008_at   | 2.3                                        | 0.0054                                       | 1.9                                      | 0.0085                                     | 0.4                                       | 0.5573                                      | 0.8                                       | 0.2718                                      | At5g56270    | WRKY2    | WRKY DNA-binding protein 2                                    |
| 2  | 256609_at   | 1.9                                        | 0.0076                                       | 2.1                                      | 0.0012                                     | 0.9                                       | 0.1453                                      | 0.6                                       | 0.2886                                      | At3g30843    |          | transposable element gene                                     |
| 3  | 258679_at   | 1.1                                        | 0.0047                                       | 1.1                                      | 0.0016                                     | -0.3                                      | 0.3670                                      | -0.3                                      | 0.3211                                      | At3g08590    | iPGAM2   | Phosphoglycerate mutase, 2,3-bisphosphoglycerate-independent  |
| 1  | 261241_at   | 3.3                                        | 0.0000                                       | 1.1                                      | 0.0588                                     | -2.3                                      | 0.0012                                      | -0.1                                      | 0.8766                                      | At1g32950    |          | Subtilase family protein                                      |
| 2  | 251144_at   | 3.2                                        | 0.0015                                       | -0.3                                     | 0.6833                                     | -2.6                                      | 0.0052                                      | 0.9                                       | 0.2648                                      | At5g01210    |          | HXXXD-type acyl-transferase family protein                    |
| 3  | 246675_at   | 2.8                                        | 0.0088                                       | -0.3                                     | 0.7144                                     | -2.7                                      | 0.0091                                      | 0.5                                       | 0.6076                                      | At5g31411    |          | putative protein                                              |
| 4  | 257440_at   | 2.8                                        | 0.0042                                       | -0.1                                     | 0.8532                                     | -2.8                                      | 0.0027                                      | 0.1                                       | 0.8734                                      | At2g24880    |          | Plant self-incompatibility protein S1 family                  |
| 5  | 259014_at   | 2.8                                        | 0.0015                                       | -0.9                                     | 0.2169                                     | -2.2                                      | 0.0065                                      | 1.5                                       | 0.0548                                      | At3g07320    |          | O-Glycosyl hydrolases family 17 protein                       |
| 6  | 247340_at   | 2.8                                        | 0.0030                                       | -0.7                                     | 0.3716                                     | -3.6                                      | 0.0002                                      | -0.2                                      | 0.8092                                      | At5g63700    |          | zinc ion binding/DNA binding                                  |
| 7  | 262993_at   | 2.8                                        | 0.0100                                       | -1.6                                     | 0.0800                                     | -3.1                                      | 0.0031                                      | 1.3                                       | 0.1834                                      | At1g54230    |          | Winged helix-turn-helix transcription repressor DNA-binding   |
| 8  | 263046_at   | 2.7                                        | 0.0003                                       | -0.6                                     | 0.3077                                     | -2.5                                      | 0.0004                                      | 0.8                                       | 0.1802                                      | At2g05380    | GRP35    | glycine-rich protein 3 short isoform                          |
| 9  | 262223_at   | 2.4                                        | 0.0006                                       | 0.1                                      | 0.7801                                     | -1.9                                      | 0.0025                                      | 0.3                                       | 0.5768                                      | At1g74680    |          | Exostosin family protein                                      |
| 10 | 264081_at   | 2.3                                        | 0.0017                                       | -0.5                                     | 0.3820                                     | -2.3                                      | 0.0009                                      | 0.5                                       | 0.4490                                      | At2g28530    |          | putative RING zinc finger transcription negative regulator    |
| 11 | 264665_at   | 2.2                                        | 0.0023                                       | 0.3                                      | 0.6291                                     | -1.7                                      | 0.0092                                      | 0.2                                       | 0.7444                                      | At1g09670    |          | unknown protein                                               |
| 12 | 245405_at   | 2.2                                        | 0.0034                                       | -0.1                                     | 0.8209                                     | -2.1                                      | 0.0025                                      | 0.2                                       | 0.7937                                      | At4g17150    |          | alpha/beta-Hydrolases superfamily protein                     |
| 13 | 265248_at   | 2.0                                        | 0.0042                                       | -0.2                                     | 0.6689                                     | -1.8                                      | 0.0061                                      | 0.4                                       | 0.4602                                      | At2g43010    | SRL2     | phytochrome interacting factor 4                              |
| 14 | 250306_at   | 1.9                                        | 0.0011                                       | -0.4                                     | 0.4101                                     | -1.4                                      | 0.0086                                      | 0.9                                       | 0.0722                                      | At5g12160    |          | putative protein                                              |
| 15 | 267027_at   | 1.7                                        | 0.0096                                       | -1.2                                     | 0.0316                                     | -1.9                                      | 0.0028                                      | 1.0                                       | 0.0877                                      | At2g38330    |          | MATE efflux family protein                                    |
| 16 | 260304_at   | 1.7                                        | 0.0005                                       | 0.3                                      | 0.3524                                     | -1.6                                      | 0.0005                                      | -0.3                                      | 0.4667                                      | At1g70480    |          | Domain of unknown function (DUF220)                           |
| 17 | 246973_at   | 1.6                                        | 0.0038                                       | -0.4                                     | 0.4427                                     | -1.8                                      | 0.0012                                      | 0.2                                       | 0.6791                                      | At5g24970    |          | Protein kinase superfamily protein                            |
| 18 | 263867_at   | 1.6                                        | 0.0076                                       | -0.3                                     | 0.5672                                     | -1.6                                      | 0.0051                                      | 0.3                                       | 0.5982                                      | At2g36830    | TIP1;1   | gamma tonoplast intrinsic protein                             |
| 19 | 251050_at   | 1.3                                        | 0.0095                                       | -0.4                                     | 0.3519                                     | -1.8                                      | 0.0004                                      | -0.1                                      | 0.7705                                      | At5g02440    |          | putative protein                                              |
| 20 | 260540_at   | 1.1                                        | 0.0091                                       | 0.2                                      | 0.5407                                     | -1.0                                      | 0.0082                                      | -0.2                                      | 0.6370                                      | At2g43500    |          | Plant regulator RWP-RK family protein                         |
| 21 | 246486_at   | -1.3                                       | 0.0074                                       | 0.7                                      | 0.1005                                     | 1.6                                       | 0.0010                                      | -0.4                                      | 0.3744                                      | At5g15910    |          | NAD(P)-binding Rossmann-fold superfamily protein              |
| 22 | 259727_at   | -1.5                                       | 0.0051                                       | 1.1                                      | 0.0252                                     | 1.7                                       | 0.0015                                      | -0.9                                      | 0.0695                                      | At1g60950    | FED A    | 2Fe-2S ferredoxin-like superfamily protein                    |
| 23 | 252097_at   | -2.4                                       | 0.0048                                       | 1.4                                      | 0.0548                                     | 2.1                                       | 0.0084                                      | -1.7                                      | 0.0295                                      | At3g51090    |          | Protein of unknown function (DUF1640)                         |
| 24 | 260911_at   | -2.6                                       | 0.0041                                       | 1.1                                      | 0.1395                                     | 2.2                                       | 0.0094                                      | -1.5                                      | 0.0606                                      | At1g02490    |          | hypothetical protein                                          |
| 25 | 251401_at   | -3.2                                       | 0.0038                                       | 1.8                                      | 0.0562                                     | 2.8                                       | 0.0068                                      | -2.2                                      | 0.0292                                      | At3g60270    |          | Cupredoxin superfamily protein                                |
| 26 | 263830_at   | 3.3                                        | 0.0092                                       | 1.1                                      | 0.3116                                     | -2.0                                      | 0.0755                                      | 0.2                                       | 0.8508                                      | At2g40260    |          | Homeodomain-like superfamily protein                          |
| 27 | 262812_at   | 3.3                                        | 0.0030                                       | 0.6                                      | 0.4765                                     | -1.5                                      | 0.1198                                      | 1.2                                       | 0.2212                                      | At1g11690    |          | hypothetical protein                                          |
| 28 | 246677_at   | 2.9                                        | 0.0049                                       | 0.7                                      | 0.3846                                     | -0.6                                      | 0.5053                                      | 1.6                                       | 0.0835                                      | At5g32202    |          | putative protein                                              |
| 29 | 265038_at   | 2.9                                        | 0.0040                                       | 0.4                                      | 0.6564                                     | -1.6                                      | 0.0758                                      | 1.0                                       | 0.2686                                      | At1g03920    |          | Protein kinase family protein                                 |
| 30 | 262680_at   | 2.8                                        | 0.0066                                       | -1.1                                     | 0.2089                                     | -2.2                                      | 0.0229                                      | 1.7                                       | 0.0642                                      | At1g75880    |          | SGNH hydrolase-type esterase superfamily protein              |
| 31 | 260290_at   | 2.8                                        | 0.0023                                       | 0.1                                      | 0.8998                                     | -1.9                                      | 0.0212                                      | 0.8                                       | 0.3009                                      | At1g80510    |          | Transmembrane amino acid transporter family protein           |
| 32 | 255362_at   | 2.8                                        | 0.0035                                       | 1.0                                      | 0.2075                                     | -1.3                                      | 0.1350                                      | 0.6                                       | 0.4893                                      | At4g04000    |          | transposable element gene                                     |
| 33 | 262711_at   | 2.8                                        | 0.0008                                       | 0.8                                      | 0.2195                                     | -1.6                                      | 0.0255                                      | 0.4                                       | 0.5818                                      | At1g16500    |          | hypothetical protein                                          |
| 34 | 252105_at   | 2.8                                        | 0.0088                                       | -0.4                                     | 0.6181                                     | -2.4                                      | 0.0153                                      | 0.8                                       | 0.3874                                      | At3g51470    |          | Protein phosphatase 2C family protein                         |
| 35 | 261715_at   | 2.6                                        | 0.0056                                       | 0.9                                      | 0.2610                                     | -1.1                                      | 0.1665                                      | 0.6                                       | 0.4604                                      | At1g18485    |          | Pentatricopeptide repeat (PPR) superfamily protein            |
| 36 | 265519_at   | 2.5                                        | 0.0038                                       | 0.9                                      | 0.2241                                     | -1.0                                      | 0.1757                                      | 0.6                                       | 0.3933                                      | At2g06030    |          | hypothetical protein                                          |
| 37 | 266766_at   | 2.5                                        | 0.0093                                       | 0.7                                      | 0.3836                                     | -2.0                                      | 0.0226                                      | -0.2                                      | 0.7865                                      | At2g46880    | PAP14    | purple acid phosphatase 14                                    |
| 38 | 263165_at   | 2.4                                        | 0.0083                                       | -0.6                                     | 0.4107                                     | -1.8                                      | 0.0356                                      | 1.3                                       | 0.1196                                      | At1g03060    | SPI      | Beige/BEACH domain ;WD domain, G-beta repeat protein          |
| 39 | 247617_at   | 2.4                                        | 0.0022                                       | 0.7                                      | 0.2522                                     | -1.6                                      | 0.0267                                      | 0.1                                       | 0.8342                                      | At5g60270    |          | Concanavalin A-like lectin protein kinase family protein      |
| 40 | 251261_at   | 2.4                                        | 0.0044                                       | 1.4                                      | 0.0422                                     | -1.9                                      | 0.0151                                      | -0.9                                      | 0.2023                                      | At3g62110    |          | Pectin lyase-like superfamily protein                         |
| 41 | 259789_at   | 2.4                                        | 0.0015                                       | 1.4                                      | 0.0263                                     | 0.0                                       | 0.9908                                      | 1.0                                       | 0.1176                                      | At1g29395    | OR414-TM | COLD REGULATED 314 INNER MEMBRANE 1                           |
| 42 | 254780_s_at | 2.4                                        | 0.0070                                       | 0.9                                      | 0.2350                                     | -1.9                                      | 0.0183                                      | -0.4                                      | 0.5867                                      | At4g12770    |          | Chaperone DnaJ-domain superfamily protein                     |
| 43 | 253054_at   | 2.3                                        | 0.0071                                       | -0.4                                     | 0.5908                                     | -2.1                                      | 0.0111                                      | 0.6                                       | 0.3917                                      | At4g37580    | UNS2     | Acyl-CoA N-acyltransferases (NAT) superfamily protein         |
| 44 | 250147_at   | 2.1                                        | 0.0056                                       | 0.3                                      | 0.6535                                     | -1.5                                      | 0.0284                                      | 0.3                                       | 0.6365                                      | At5g14600    |          | S-adenosyl-L-methionine-dependent methyltransferases          |
| 45 | 266217_at   | 2.0                                        | 0.0017                                       | 0.0                                      | 0.9541                                     | -1.4                                      | 0.0147                                      | 0.6                                       | 0.2904                                      | At2g28820    |          | unknown protein                                               |
| 46 | 264524_at   | 1.4                                        | 0.0035                                       | 0.1                                      | 0.7655                                     | -0.2                                      | 0.6145                                      | 1.1                                       | 0.0141                                      | At1g10070    | BCAT-2   | branched-chain amino acid transaminase 2                      |
| 47 | 261551_at   | 1.4                                        | 0.0005                                       | 0.1                                      | 0.6532                                     | -0.3                                      | 0.3297                                      | 0.9                                       | 0.0081                                      | At1g63440    | HMA5     | heavy metal atpase 5                                          |
| 48 | 252825_at   | 1.4                                        | 0.0085                                       | 0.0                                      | 0.9548                                     | -1.0                                      | 0.0437                                      | 0.4                                       | 0.3948                                      | At4g39890    | RABH1c   | RAB GTPase homolog H1C                                        |
| 49 | 256548_at   | 1.4                                        | 0.0005                                       | 0.5                                      | 0.1262                                     | 0.0                                       | 0.8901                                      | 0.9                                       | 0.0067                                      | At3g14770    | SWEET2   | Nodulin MtN3 family protein                                   |
| 50 | 249916_at   | 1.3                                        | 0.0075                                       | 0.6                                      | 0.1609                                     | -0.5                                      | 0.2095                                      | 0.2                                       | 0.6447                                      | At5g22880    | HTB2     | histone B2                                                    |
| 51 | 267053_s_at | 1.3                                        | 0.0019                                       | 0.1                                      | 0.8124                                     | -0.7                                      | 0.0565                                      | 0.5                                       | 0.1449                                      | At2g38390    |          | Peroxidase superfamily protein                                |
| 52 | 246076_at   | 1.2                                        | 0.0075                                       | -0.1                                     | 0.7053                                     | -0.7                                      | 0.1037                                      | 0.7                                       | 0.0881                                      | At5g20280    | SPSA1    | sucrose phosphate synthase 1F                                 |
| 53 | 259081_at   | 1.2                                        | 0.0063                                       | 0.2                                      | 0.6587                                     | -0.7                                      | 0.0801                                      | 0.4                                       | 0.3521                                      | At3g05030    | NHX2     | sodium hydrogen exchanger 2                                   |
| 54 | 259292_at   | 1.2                                        | 0.0018                                       | -0.2                                     | 0.4826                                     | -0.9                                      | 0.0070                                      | 0.5                                       | 0.1597                                      | At3g11560    |          | LETM1-like protein                                            |
| 55 | 263296_at   | 1.2                                        | 0.0001                                       | 0.1                                      | 0.5833                                     | -0.3                                      | 0.2083                                      | 0.8                                       | 0.0033                                      | At2g38800    |          | Plant calmodulin-binding protein-related                      |
| 56 | 264279_s_at | 1.2                                        | 0.0018                                       | 0.8                                      | 0.0085                                     | 0.5                                       | 0.1405                                      | 0.8                                       | 0.0175                                      | At1g78820    |          | D-mannose binding lectin protein;                             |
| 57 | 249134_at   | 1.1                                        | 0.0077                                       | 0.8                                      | 0.0228                                     | -0.4                                      | 0.3427                                      | -0.1                                      | 0.8653                                      | At5g43150    |          | unknown protein                                               |
| 58 | 251905_at   | 1.1                                        | 0.0058                                       | -0.1                                     | 0.7043                                     | -0.8                                      | 0.0302                                      | 0.4                                       | 0.2131                                      | At3g53710    | AGD6     | ARF-GAP domain 6                                              |
| 59 | 251438_s_at | 1.1                                        | 0.0090                                       | 0.6                                      | 0.1032                                     | 0.1                                       | 0.7048                                      | 0.7                                       | 0.0831                                      | At3g59930    |          | putative protein                                              |
| 60 | 249504_at   | 1.1                                        | 0.0003                                       | 0.3                                      | 0.1457                                     | -0.2                                      | 0.4906                                      | 0.6                                       | 0.0209                                      | At5g38850    |          | Disease resistance protein (TIR-NBS-LRR class)                |
| 61 | 259910_at   | 1.1                                        | 0.0059                                       | 0.0                                      | 0.8908                                     | -0.7                                      | 0.0399                                      | 0.4                                       | 0.2499                                      | At1g72700    |          | ATPase E1-E2 type family protein                              |
| 62 | 253322_at   | 1.1                                        | 0.0036                                       | 0.0                                      | 0.9544                                     | -0.2                                      | 0.5335                                      | 0.9                                       | 0.0112                                      | At4g33980    |          | putative protein                                              |
| 63 | 261612_at   | 1.1                                        | 0.0026                                       | -0.1                                     | 0.8331                                     | -0.7                                      | 0.0371                                      | 0.5                                       | 0.1258                                      | At1g49710    | FUT12    | fucosyltransferase 12                                         |
| 64 | 262047_at   | 1.0                                        | 0.0040                                       | 0.1                                      | 0.6932                                     | 0.0                                       | 0.8956                                      | 1.0                                       | 0.0047                                      | At1g80160    | GLY17    | Lactoylglutathione lyase / glyoxalase I family protein        |
| 65 | 257621_at   | 1.0                                        | 0.0035                                       | 0.3                                      | 0.3252                                     | 0.1                                       | 0.6873                                      | 0.9                                       | 0.0079                                      | At3g20410    | CPK9     | calmodulin-domain protein kinase 9                            |
| 66 | 256526_at   | -1.0                                       | 0.0079                                       | 0.0                                      | 0.9624                                     | 0.7                                       | 0.0335                                      | -0.3                                      | 0.3913                                      | At1g66090    |          | Disease resistance protein (TIR-NBS class)                    |
| 67 | 256964_at   | -1.0                                       | 0.0039                                       | -0.1                                     | 0.7551                                     | 0.4                                       | 0.2078                                      | -0.6                                      | 0.0796                                      | At3g13520    | ATAGP12  | arabinogalactan protein 12                                    |
| 68 | 264923_s_at | -1.0                                       | 0.0093                                       | 0.6                                      | 0.0895                                     | 0.9                                       | 0.0201                                      | -0.8                                      | 0.0404                                      | At1g60740    |          | Thioredoxin superfamily protein                               |
| 69 | 256252_at   | -1.1                                       | 0.0071                                       | 0.0                                      | 0.9524                                     | 0.1                                       | 0.6966                                      | -0.9                                      | 0.0105                                      | At3g11340    | UGT76B1  | UDP-Glycosyltransferase superfamily protein                   |
| 70 | 264264_at   | -1.1                                       | 0.0044                                       | -0.4                                     | 0.2199                                     | 0.0                                       | 0.9195                                      | -0.7                                      | 0.0496                                      | At1g09250    |          | basic helix-loop-helix (bHLH) DNA-binding superfamily protein |
| 71 | 251834_at   | -1.1                                       | 0.0001                                       | -0.1                                     | 0.5206                                     | 0.3                                       | 0.2434                                      | -0.7                                      | 0.0041                                      | At3g55170    |          | Ribosomal L29 family protein                                  |
| 72 | 255064_at   | -1.1                                       | 0.0007                                       | -0.8                                     | 0.0044                                     | 0.1                                       | 0.7122                                      | -0.2                                      | 0.4366                                      | At4g08950    | EXO      | Phosphate-responsive 1 family protein                         |
| 73 | 246274_at   | -1.1                                       | 0.0015                                       | 0.0                                      | 0.8714                                     | 0.96                                      | 0.0037                                      | -0.2                                      | 0.4651                                      | At4g36620    | HANL2    | GATA transcription factor 19                                  |
| 74 | 251373_at   | -1.1                                       | 0.0014                                       | -0.6                                     | 0.0582                                     | -0.1                                      | 0.6749                                      | -0.7                                      | 0.0234                                      | At3g60530    | GATA4    | GATA transcription factor 4                                   |
| 75 | 247189_at   | -1.2                                       | 0.0042                                       | -0.1                                     | 0.7829                                     | 0.2                                       | 0.5375                                      | -0.9                                      | 0.0206                                      | At5g65390    | AGP7     | arabinogalactan protein 7                                     |
| 76 | 258432_at   | -1.2                                       | 0.0007                                       | -0.7                                     | 0.0133                                     | 0.2                                       | 0.4285                                      | -0.2                                      | 0.4154                                      | At3g16570    | RALF23   | rapid alkalization factor 23                                  |
| 77 | 250110_at   | -1.2                                       | 0.0019                                       | -0.6                                     | 0.0455                                     | 0.2                                       | 0.5922                                      | -0.4                                      | 0.2338                                      | At5g15350    | ENOD117  | early nodulin-like protein 17                                 |
| 78 | 255230_at   | -1.2                                       | 0.0008                                       | -0.3                                     | 0.3110                                     | 0.3                                       | 0.2597                                      | -0.6                                      | 0.0553                                      | At4g05390    | RFNR1    | root FNR 1                                                    |
| 79 | 257322_at   | -1.3                                       | 0.0059                                       | -0.7                                     | 0.0847                                     | -0.1                                      | 0.8959                                      | -0.7                                      | 0.1100                                      | orf111b      |          | hypothetical protein                                          |
| 80 | 250316_at   | -1.3                                       | 0.0029                                       | 0.0                                      | 0.9571                                     | 0.4                                       | 0.3359                                      | -1.0                                      | 0.0194                                      | At5g12140    | CYS1     | cystatin-1                                                    |
| 81 | 258920_at   | -1.4                                       | 0.0061                                       | 0.1                                      | 0.8647                                     | 0.9                                       | 0.0449                                      | -0.5                                      | 0.2235                                      | At3g10520    | NSHB2    | haemoglobin 2                                                 |
| 82 | 260371_at   | -1.4                                       | 0.0089                                       | -0.1                                     | 0.8349                                     | 0.6                                       | 0.1847                                      | -0.7                                      | 0.1536                                      | At1g69690    | TCP15    | TCP family transcription factor                               |
| 83 | 261199_at   | -1.5                                       | 0.0016                                       | -0.4                                     | 0.2848                                     | 0.1                                       | 0.7820                                      | -1.0                                      | 0.0197                                      | At1g12950    | RSH2     | root hair specific 2                                          |
| 84 | 246550_at   | -1.6                                       | 0.0006                                       | -0.3                                     | 0.4301                                     | 0.4                                       | 0.3154                                      | -0.9                                      | 0.0215                                      | At5g14920    |          | Gibberellin-regulated family protein                          |
| 85 | 259645_at   | -1.9                                       | 0.0048                                       | -0.5                                     | 0.3423                                     | 0.3                                       | 0.6045                                      | -1.1                                      | 0.0714                                      | At1g69010    | BIM2     | BES1-interacting Myc-like protein 2                           |
| 86 | 252741_at   | -1.9                                       | 0.0020                                       | -0.1                                     | 0.8940                                     | 0.6                                       | 0.2439                                      | -1.2                                      | 0.0255                                      | At3g43280    |          | putative protein                                              |
| 87 | 253168_at   | -2.1                                       | 0.0091                                       | -0.1                                     | 0.9199                                     | 0.6                                       | 0.3940                                      | -1.5                                      | 0.0509                                      | At4g35070    |          | SBP (S-ribonuclease binding protein) family protein           |
| 88 | 252801_at   | -2.2                                       | 0.0052                                       | -1.2                                     | 0.0728                                     | 1.6                                       | 0.0304                                      | 0.5                                       | 0.4307                                      | At3g42340    |          | transposable element gene                                     |
| 89 | 251995_at   | -2.3                                       | 0.0066                                       | -0.6                                     | 0.3762                                     | 0.4                                       | 0.5901                                      | -1.3                                      | 0.0869                                      | At3g52940    | HYD2     | Ergosterol biosynthesis ERG4/ERG24 family                     |
| 90 | 259208_at   | -2.3                                       |                                              |                                          |                                            |                                           |                                             |                                           |                                             |              |          |                                                               |

|     |             |      |        |      |        |      |        |      |        |           |         |                                                                     |
|-----|-------------|------|--------|------|--------|------|--------|------|--------|-----------|---------|---------------------------------------------------------------------|
| 94  | 244947_at   | -2.6 | 0.0050 | -2.0 | 0.0135 | -0.1 | 0.9339 | -0.7 | 0.4036 | orf121a   |         | hypothetical protein                                                |
| 95  | 259581_at   | -2.8 | 0.0066 | -0.6 | 0.4850 | 1.5  | 0.1108 | -0.8 | 0.3996 | At1g28040 |         | RING/U-box superfamily protein                                      |
| 96  | 255730_at   | -2.9 | 0.0078 | 0.8  | 0.3835 | 1.6  | 0.1046 | -2.1 | 0.0355 | At1g25460 |         | NAD(P)-binding Rossmann-fold superfamily protein                    |
| 97  | 247725_at   | -2.9 | 0.0002 | -1.0 | 0.1030 | 0.3  | 0.6749 | -1.7 | 0.0120 | At5g59410 |         | Rab5-interacting family protein                                     |
| 98  | 248233_at   | -2.9 | 0.0025 | 0.0  | 0.9503 | 2.1  | 0.0169 | -0.9 | 0.2856 | At5g53840 |         | F-box/RNI-like/FBD-like domains-containing protein                  |
| 99  | 264114_at   | -3.2 | 0.0015 | -0.7 | 0.3768 | 0.4  | 0.6462 | -2.1 | 0.0189 | At2g31270 | CDT1A   | homolog of yeast CDT1 A                                             |
| 100 | 256859_at   | -3.4 | 0.0014 | -0.3 | 0.7593 | 1.3  | 0.1376 | -1.8 | 0.0507 | At3g22940 |         | F-box associated ubiquitination effector family protein             |
| 101 | 259753_at   | -3.5 | 0.0027 | 0.5  | 0.5907 | 2.4  | 0.0188 | -1.5 | 0.1323 | At1g71050 | HIPP20  | Heavy metal transport/detoxification superfamily protein            |
| 102 | 245354_at   | -3.6 | 0.0007 | -1.1 | 0.1762 | 1.5  | 0.0906 | -1.0 | 0.2682 | At4g17600 | LIL3:1  | Chlorophyll A-B binding family protein                              |
| 1   | 266969_at   | 2.7  | 0.0031 | -1.0 | 0.1649 | -1.3 | 0.1020 | 2.4  | 0.0046 | At2g39540 |         | Gibberellin-regulated family protein                                |
| 2   | 252265_at   | 2.0  | 0.0006 | -0.5 | 0.2788 | -0.1 | 0.7503 | 2.3  | 0.0001 | At3g49620 | DIN11   | 2-oxoglutarate (2OG) and Fe(II)-dependent oxygenase                 |
| 3   | 247047_at   | 1.6  | 0.0008 | 0.3  | 0.4358 | 0.4  | 0.3011 | 1.7  | 0.0002 | At5g66650 |         | Protein of unknown function (DUF607)                                |
| 4   | 257401_at   | 1.5  | 0.0026 | -0.1 | 0.7663 | -0.4 | 0.3482 | 1.2  | 0.0080 | At1g23550 | SRO2    | similar to RCD one 2                                                |
| 5   | 265387_at   | 1.1  | 0.0012 | -0.3 | 0.3633 | -0.4 | 0.2237 | 1.0  | 0.0018 | At2g20670 |         | Protein of unknown function (DUF506)                                |
| 6   | 254088_at   | -1.1 | 0.0089 | 0.2  | 0.4892 | 0.3  | 0.4316 | -1.1 | 0.0086 | At4g24880 |         | putative protein snurportin1 m3G-cap-specific nuclear import        |
| 7   | 245362_at   | -1.1 | 0.0013 | 0.1  | 0.7136 | 0.2  | 0.5628 | -1.1 | 0.0014 | At4g17460 | HAT1    | Homeobox-leucine zipper protein 4 (HB-4) / HD-ZIP protein           |
| 8   | 262230_at   | -1.2 | 0.0029 | -0.2 | 0.5550 | -0.4 | 0.2429 | -1.4 | 0.0004 | At1g68560 | XYL1    | alpha-xylosidase 1                                                  |
| 9   | 255447_at   | -1.4 | 0.0022 | 0.0  | 0.9294 | 0.0  | 0.9265 | -1.4 | 0.0014 | At4g02790 | EMB3129 | GTP-binding family protein                                          |
| 10  | 251442_at   | -1.5 | 0.0029 | 0.1  | 0.8123 | 0.4  | 0.3648 | -1.2 | 0.0093 | At3g59980 |         | Nucleic acid-binding, OB-fold-like protein                          |
| 11  | 255433_at   | -1.9 | 0.0010 | -0.4 | 0.4233 | 0.1  | 0.7513 | -1.4 | 0.0075 | At4g03210 | XTH9    | xyloglucan endotransglucosylase/hydrolase 9                         |
| 12  | 266215_at   | -1.9 | 0.0046 | 0.2  | 0.6732 | 0.1  | 0.8171 | -2.0 | 0.0021 | At2g06850 | XTH4    | xyloglucan endotransglucosylase/hydrolase 4                         |
| 13  | 250928_at   | -2.1 | 0.0049 | -0.2 | 0.7213 | 0.1  | 0.8873 | -1.8 | 0.0098 | At5g03280 | PIR2    | NRAMP metal ion transporter family protein                          |
| 14  | 257701_at   | -2.2 | 0.0008 | 0.0  | 0.9948 | 0.0  | 0.9506 | -2.2 | 0.0006 | At3g12710 |         | DNA glycosylase superfamily protein                                 |
| 15  | 258996_at   | -2.2 | 0.0046 | -0.5 | 0.4387 | -0.6 | 0.3450 | -2.4 | 0.0019 | At3g01800 |         | Ribosome recycling factor                                           |
| 16  | 252397_at   | -2.5 | 0.0007 | 0.3  | 0.6502 | 1.0  | 0.1274 | -1.8 | 0.0062 | At3g47980 |         | Integral membrane HPP family protein                                |
| 17  | 253177_s at | -2.6 | 0.0051 | 0.4  | 0.6128 | 0.6  | 0.4324 | -2.3 | 0.0071 | At4g35150 |         | O-methyltransferase family protein                                  |
| 18  | 266035_at   | -2.6 | 0.0000 | -0.2 | 0.7138 | 0.5  | 0.3339 | -2.0 | 0.0004 | At2g05990 | MOD1    | NAD(P)-binding Rossmann-fold superfamily protein                    |
| 19  | 266857_at   | -2.9 | 0.0002 | 0.0  | 0.9809 | 0.0  | 0.9712 | -2.9 | 0.0001 | At2g26900 | BASS2   | Sodium Bile acid symporter family                                   |
| 20  | 266054_at   | -2.9 | 0.0007 | -0.7 | 0.3011 | -1.0 | 0.1730 | -3.1 | 0.0002 | At2g40640 |         | RING/U-box superfamily protein                                      |
| 21  | 262475_at   | -2.9 | 0.0032 | 0.3  | 0.7062 | 0.8  | 0.3190 | -2.3 | 0.0096 | At1g50340 |         | Plant invertase/pectin methylesterase inhibitor superfamily protein |
| 22  | 257173_at   | -2.9 | 0.0002 | -0.4 | 0.4520 | 0.6  | 0.3117 | -1.8 | 0.0062 | At3g23810 | SAHH2   | S-adenosyl-l-homocysteine (SAH) hydrolase 2                         |
| 23  | 264204_at   | -3.3 | 0.0025 | 0.5  | 0.5918 | 0.9  | 0.3453 | -2.9 | 0.0046 | At1g22710 | SUT1    | sucrose-proton symporter 2                                          |
| 24  | 251344_at   | -3.8 | 0.0006 | 1.8  | 0.0435 | 1.7  | 0.0703 | -3.9 | 0.0003 | At3g60920 |         | putative protein beige-like protein (CDC4L) - Homo sapiens          |
| 25  | 251048_at   | -4.0 | 0.0005 | 0.7  | 0.4367 | 1.8  | 0.0697 | -3.0 | 0.0043 | At5g02410 | ALG10   | DIE2/ALG10 family                                                   |
