# Supplementary material
Source: PubMed Central journal article supplement (PMC8024390)
Supplement: Table_S7.pdf [file Table_S7.pdf]

|    | ProbelD     | IgFC<br>F <sup>ARE</sup> : F <sup>WT</sup> | pValue<br>F <sup>ARE</sup> : F <sup>WT</sup> | IgFC<br>F <sup>WT</sup> : G <sup>WT</sup> | pValue<br>F <sup>WT</sup> : G <sup>WT</sup> | IgFC<br>F <sup>ARE</sup> : G <sup>ARE</sup> | pValue<br>F <sup>ARE</sup> : G <sup>ARE</sup> | IgFC<br>G <sup>ARE</sup> : G <sup>WT</sup> | pValue<br>G <sup>ARE</sup> : G <sup>WT</sup> | TranscriptID | Alias   | Full name                                                    |
|----|-------------|--------------------------------------------|----------------------------------------------|-------------------------------------------|---------------------------------------------|---------------------------------------------|-----------------------------------------------|--------------------------------------------|----------------------------------------------|--------------|---------|--------------------------------------------------------------|
| 1  | 266969_at   | 2.4                                        | 0.0046                                       | -1.0                                      | 0.1649                                      | 2.7                                         | 0.0031                                        | -1.3                                       | 0.1020                                       | At2g39540    |         | Gibberellin-regulated family protein                         |
| 2  | 252265_at   | 2.3                                        | 0.0001                                       | -0.5                                      | 0.2788                                      | 2.0                                         | 0.0006                                        | -0.1                                       | 0.7503                                       | At3g49620    | DIN11   | 2-oxoglutarate (2OG) and Fe(II)-dependent oxygenase          |
| 3  | 247047_at   | 1.7                                        | 0.0002                                       | 0.3                                       | 0.4358                                      | 1.6                                         | 0.0008                                        | 0.4                                        | 0.3011                                       | At5g66650    |         | Protein of unknown function (DUF607)                         |
| 4  | 257401_at   | 1.2                                        | 0.0080                                       | -0.1                                      | 0.7663                                      | 1.5                                         | 0.0026                                        | -0.4                                       | 0.3482                                       | At1g23550    | SRO2    | similar to RCD one 2                                         |
| 5  | 265387_at   | 1.0                                        | 0.0018                                       | -0.3                                      | 0.3633                                      | 1.1                                         | 0.0012                                        | -0.4                                       | 0.2237                                       | At2g20670    |         | Protein of unknown function (DUF506)                         |
| 6  | 254088_at   | -1.1                                       | 0.0086                                       | 0.2                                       | 0.4892                                      | -1.1                                        | 0.0089                                        | 0.3                                        | 0.4316                                       | At4g24880    |         | putative protein snurportin1 m3G-cap-specific nuclear import |
| 7  | 245362_at   | -1.1                                       | 0.0014                                       | 0.1                                       | 0.7136                                      | -1.1                                        | 0.0013                                        | 0.2                                        | 0.5628                                       | At4g17460    | HAT1    | Homeobox-leucine zipper protein 4 (HB-4) / HD-ZIP protein    |
| 8  | 262230_at   | -1.4                                       | 0.0004                                       | -0.2                                      | 0.5550                                      | -1.2                                        | 0.0029                                        | -0.4                                       | 0.2429                                       | At1g68560    | XYL1    | alpha-xylosidase 1                                           |
| 9  | 255447_at   | -1.4                                       | 0.0014                                       | 0.0                                       | 0.9294                                      | -1.4                                        | 0.0022                                        | 0.0                                        | 0.9265                                       | At4g02790    | EMB3129 | GTP-binding family protein                                   |
| 10 | 251442_at   | -1.2                                       | 0.0093                                       | 0.1                                       | 0.8123                                      | -1.5                                        | 0.0029                                        | 0.4                                        | 0.3648                                       | At3g59980    |         | Nucleic acid-binding, OB-fold-like protein                   |
| 11 | 255433_at   | -1.4                                       | 0.0075                                       | -0.4                                      | 0.4233                                      | -1.9                                        | 0.0010                                        | 0.1                                        | 0.7513                                       | At4g03210    | XTH9    | xyloglucan endotransglucosylase/hydrolase 9                  |
| 12 | 266215_at   | -2.0                                       | 0.0021                                       | 0.2                                       | 0.6732                                      | -1.9                                        | 0.0046                                        | 0.1                                        | 0.8171                                       | At2g06850    | XTH4    | xyloglucan endotransglucosylase/hydrolase 4                  |
| 13 | 250928_at   | -1.8                                       | 0.0098                                       | -0.2                                      | 0.7213                                      | -2.1                                        | 0.0049                                        | 0.1                                        | 0.8873                                       | At5g03280    | PIR2    | NRAMP metal ion transporter family protein                   |
| 14 | 257701_at   | -2.2                                       | 0.0006                                       | 0.0                                       | 0.9948                                      | -2.2                                        | 0.0008                                        | 0.0                                        | 0.9506                                       | At3g12710    |         | DNA glycosylase superfamily protein                          |
| 15 | 258996_at   | -2.4                                       | 0.0019                                       | -0.5                                      | 0.4387                                      | -2.2                                        | 0.0046                                        | -0.6                                       | 0.3450                                       | At3g01800    |         | Ribosome recycling factor                                    |
| 16 | 252397_at   | -1.8                                       | 0.0062                                       | 0.3                                       | 0.6502                                      | -2.5                                        | 0.0007                                        | 1.0                                        | 0.1274                                       | At3g47980    |         | Integral membrane HPP family protein                         |
| 17 | 253177_s_at | -2.3                                       | 0.0071                                       | 0.4                                       | 0.6128                                      | -2.6                                        | 0.0051                                        | 0.6                                        | 0.4324                                       | At4g35150    |         | O-methyltransferase family protein                           |
| 18 | 266035_at   | -2.0                                       | 0.0004                                       | -0.2                                      | 0.7138                                      | -2.6                                        | 0.0000                                        | 0.5                                        | 0.3339                                       | At2g05990    | MOD1    | NAD(P)-binding Rossmann-fold superfamily protein             |
| 19 | 266857_at   | -2.9                                       | 0.0001                                       | 0.0                                       | 0.9809                                      | -2.9                                        | 0.0002                                        | 0.0                                        | 0.9712                                       | At2g26900    | BASS2   | Sodium Bile acid symporter family                            |
| 20 | 266054_at   | -3.1                                       | 0.0002                                       | -0.7                                      | 0.3011                                      | -2.9                                        | 0.0007                                        | -1.0                                       | 0.1730                                       | At2g40640    |         | RING/U-box superfamily protein                               |
| 21 | 262475_at   | -2.3                                       | 0.0096                                       | 0.3                                       | 0.7062                                      | -2.9                                        | 0.0032                                        | 0.8                                        | 0.3190                                       | At1g50340    |         | Plant invertase/pectin methyltransferase inhibitor protein   |
| 22 | 257173_at   | -1.8                                       | 0.0062                                       | -0.4                                      | 0.4520                                      | -2.9                                        | 0.0002                                        | 0.6                                        | 0.3117                                       | At3g23810    | SAHH2   | S-adenosyl-L-homocysteine (SAH) hydrolase 2                  |
| 23 | 264204_at   | -2.9                                       | 0.0046                                       | 0.5                                       | 0.5918                                      | -3.3                                        | 0.0025                                        | 0.9                                        | 0.3453                                       | At1g22710    | SUT1    | sucrose-proton symporter 2                                   |
| 24 | 251344_at   | -3.9                                       | 0.0003                                       | 1.8                                       | 0.0435                                      | -3.8                                        | 0.0006                                        | 1.7                                        | 0.0703                                       | At3g60920    |         | putative protein beige-like protein (CDC4L) - Homo sapiens   |
| 25 | 251048_at   | -3.0                                       | 0.0043                                       | 0.7                                       | 0.4367                                      | -4.0                                        | 0.0005                                        | 1.8                                        | 0.0697                                       | At5g02410    | ALG10   | DI2/ALG10 family                                             |
| 1  | 266634_at   | 3.0                                        | 0.0027                                       | -2.7                                      | 0.0043                                      | 0.0                                         | 0.9607                                        | 0.4                                        | 0.6635                                       | At2g35530    | bZIP16  | basic region/leucine zipper transcription factor 16          |
| 2  | 249622_at   | 2.9                                        | 0.0055                                       | -3.3                                      | 0.0013                                      | 0.5                                         | 0.5929                                        | -0.9                                       | 0.3335                                       | At5g37550    |         | putative protein                                             |
| 3  | 249968_at   | 2.9                                        | 0.0032                                       | -2.6                                      | 0.0038                                      | 2.5                                         | 0.0114                                        | -2.3                                       | 0.0144                                       | At5g19070    |         | SNARE associated Golgi protein family                        |
| 4  | 264136_at   | 2.6                                        | 0.0003                                       | -2.4                                      | 0.0005                                      | -0.3                                        | 0.6625                                        | 0.5                                        | 0.4002                                       | At1g78980    | SRF5    | STRUBBELIG-receptor family 5                                 |
| 5  | 267091_at   | 2.3                                        | 0.0077                                       | -2.3                                      | 0.0047                                      | 0.2                                         | 0.8238                                        | -0.2                                       | 0.7848                                       | At2g38185    |         | RING/U-box superfamily protein                               |
| 6  | 259214_at   | 2.3                                        | 0.0033                                       | -2.2                                      | 0.0025                                      | 0.5                                         | 0.5018                                        | -0.4                                       | 0.5225                                       | At3g09085    |         | Protein of unknown function (DUF962)                         |
| 7  | 261162_at   | 1.5                                        | 0.0060                                       | -1.6                                      | 0.0022                                      | 0.4                                         | 0.3985                                        | -0.6                                       | 0.2668                                       | At1g34440    |         | hypothetical protein                                         |
| 8  | 246251_at   | 1.5                                        | 0.0011                                       | -1.1                                      | 0.0074                                      | 0.3                                         | 0.4292                                        | 0.1                                        | 0.8693                                       | At4g37220    |         | Cold acclimation protein WCOR413 family                      |
| 9  | 246010_at   | 1.4                                        | 0.0086                                       | -1.4                                      | 0.0045                                      | 0.4                                         | 0.4052                                        | -0.5                                       | 0.3285                                       | At5g08440    |         | putative protein                                             |
| 10 | 266440_at   | 1.3                                        | 0.0074                                       | -1.3                                      | 0.0051                                      | 0.5                                         | 0.2892                                        | -0.5                                       | 0.2701                                       | At2g43240    |         | Nucleotide-sugar transporter family protein                  |
| 11 | 252234_at   | 1.0                                        | 0.0046                                       | -1.2                                      | 0.0012                                      | 0.0                                         | 0.9174                                        | -0.2                                       | 0.6278                                       | At3g49780    | PSK4    | phytosulfokine 4 precursor                                   |
| 12 | 264698_at   | -2.4                                       | 0.0015                                       | 2.0                                       | 0.0050                                      | -0.9                                        | 0.2195                                        | 0.4                                        | 0.5366                                       | At1g70200    |         | RNA-binding (RRM/RBD/RNP motifs) family protein              |
| 13 | 267359_at   | 1.1                                        | 0.0098                                       | -1.3                                      | 0.0020                                      | 1.2                                         | 0.0120                                        | -1.4                                       | 0.0028                                       | At2g40020    |         | Nucleolar histone methyltransferase-related protein          |
| 14 | 266850_at   | 3.9                                        | 0.0011                                       | -2.4                                      | 0.0225                                      | 0.8                                         | 0.4399                                        | 0.7                                        | 0.5120                                       | At2g26850    |         | F-box family protein                                         |
| 15 | 246671_at   | 3.8                                        | 0.0003                                       | -1.3                                      | 0.1209                                      | 2.0                                         | 0.0425                                        | 0.5                                        | 0.5842                                       | At5g30820    |         | putative protein                                             |
| 16 | 247773_at   | 3.2                                        | 0.0026                                       | -2.5                                      | 0.0104                                      | 1.3                                         | 0.2115                                        | -0.5                                       | 0.5639                                       | At5g58630    |         | putative protein                                             |
| 17 | 259812_at   | 2.7                                        | 0.0005                                       | -1.6                                      | 0.0168                                      | -0.2                                        | 0.7921                                        | 1.3                                        | 0.0639                                       | At1g49840    |         | Protein of unknown function (DUF620)                         |
| 18 | 257796_at   | 2.6                                        | 0.0087                                       | -1.2                                      | 0.1864                                      | 1.4                                         | 0.1549                                        | 0.1                                        | 0.9517                                       | At3g15930    |         | Pentatricopeptide repeat (PPR) superfamily protein           |
| 19 | 261466_at   | 2.6                                        | 0.0032                                       | -1.6                                      | 0.0339                                      | 0.6                                         | 0.4562                                        | 0.3                                        | 0.6915                                       | At1g07690    |         | hypothetical protein                                         |
| 20 | 259166_at   | 2.6                                        | 0.0066                                       | -2.1                                      | 0.0174                                      | 1.7                                         | 0.0707                                        | -1.2                                       | 0.1708                                       | At3g01670    | SEOa    | unknown protein                                              |
| 21 | 257650_at   | 2.5                                        | 0.0055                                       | -1.6                                      | 0.0499                                      | 1.7                                         | 0.0514                                        | -0.8                                       | 0.3114                                       | At3g16800    |         | Protein phosphatase 2C family protein                        |
| 22 | 248004_at   | 2.5                                        | 0.0066                                       | -2.1                                      | 0.0110                                      | -0.3                                        | 0.7152                                        | 0.6                                        | 0.4440                                       | At5g56230    | PRA1.G2 | prenylated RAB acceptor 1.G2                                 |
| 23 | 266525_at   | 2.4                                        | 0.0080                                       | -2.1                                      | 0.0142                                      | 1.8                                         | 0.0534                                        | -1.4                                       | 0.0953                                       | At2g16970    | MEE15   | Major facilitator superfamily protein                        |
| 24 | 246079_at   | 2.4                                        | 0.0063                                       | -2.0                                      | 0.0147                                      | 0.5                                         | 0.5201                                        | -0.1                                       | 0.8777                                       | At5g20450    |         | putative protein unconventional myosin heavy chain           |
| 25 | 261894_at   | 2.4                                        | 0.0045                                       | -1.8                                      | 0.0171                                      | 0.5                                         | 0.5611                                        | 0.1                                        | 0.9028                                       | At1g80900    | MRS2-10 | magnesium transporter 1                                      |
| 26 | 264482_at   | 2.2                                        | 0.0086                                       | -1.7                                      | 0.0298                                      | 0.9                                         | 0.2936                                        | -0.3                                       | 0.6726                                       | At1g77210    | STP14   | sugar transporter 14                                         |
| 27 | 264151_at   | 2.0                                        | 0.0051                                       | -1.2                                      | 0.0473                                      | 0.4                                         | 0.5508                                        | 0.3                                        | 0.6103                                       | At1g02070    |         | hypothetical protein                                         |
| 28 | 252204_at   | 1.9                                        | 0.0042                                       | -0.9                                      | 0.1282                                      | -0.1                                        | 0.9352                                        | 1.1                                        | 0.0827                                       | At3g50340    |         | putative protein                                             |
| 29 | 252632_s_at | 1.6                                        | 0.0027                                       | -1.0                                      | 0.0434                                      | 0.6                                         | 0.2591                                        | 0.1                                        | 0.8669                                       | At3g44480    | RPP1    | Disease resistance protein (TIR-NBS-LRR class) family        |
| 30 | 254137_at   | 1.6                                        | 0.0061                                       | -1.2                                      | 0.0192                                      | -0.2                                        | 0.7222                                        | 0.5                                        | 0.3071                                       | At4g24930    |         | thylakoid lumenal 17.9 kDa protein, chloroplast              |
| 31 | 264814_at   | 1.6                                        | 0.0019                                       | -0.7                                      | 0.0898                                      | 0.5                                         | 0.2551                                        | 0.3                                        | 0.5193                                       | At2g17900    | SDG37   | SET domain group 37                                          |
| 32 | 255582_at   | 1.5                                        | 0.0098                                       | -0.1                                      | 0.7973                                      | 1.0                                         | 0.0768                                        | 0.3                                        | 0.5264                                       | At4g01500    | NGA4    | AP2/B3-like transcriptional factor family protein            |
| 33 | 264777_at   | 1.4                                        | 0.0028                                       | -0.5                                      | 0.2064                                      | 0.7                                         | 0.1341                                        | 0.2                                        | 0.5981                                       | At1g08630    | THA1    | threonine aldolase 1                                         |
| 34 | 251969_at   | 1.4                                        | 0.0080                                       | -1.2                                      | 0.0150                                      | -0.1                                        | 0.7701                                        | 0.4                                        | 0.4628                                       | At3g53130    | LUT1    | Cytochrome P450 superfamily protein                          |
| 35 | 266064_at   | 1.4                                        | 0.0082                                       | -1.1                                      | 0.0296                                      | 0.7                                         | 0.1616                                        | -0.4                                       | 0.4300                                       | At2g18780    |         | F-box and associated interaction domains-containing protein  |
| 36 | 247324_at   | 1.4                                        | 0.0081                                       | 0.2                                       | 0.6388                                      | 1.3                                         | 0.0171                                        | 0.3                                        | 0.5222                                       | At5g64190    |         | putative protein                                             |
| 37 | 253161_at   | 1.4                                        | 0.0097                                       | -0.3                                      | 0.4573                                      | 1.3                                         | 0.0145                                        | -0.3                                       | 0.5077                                       | At4g35770    | SEN1    | Rhodanese/Cell cycle control phosphatase protein             |
| 38 | 263112_at   | 1.3                                        | 0.0070                                       | -0.2                                      | 0.7052                                      | 1.3                                         | 0.0120                                        | -0.1                                       | 0.7931                                       | At1g03080    |         | kinase interacting (KIP1-like) family protein                |
| 39 | 262279_at   | 1.3                                        | 0.0089                                       | -0.7                                      | 0.1359                                      | 0.7                                         | 0.1353                                        | -0.1                                       | 0.8388                                       | At1g68630    |         | PLAC8 family protein                                         |
| 40 | 245905_at   | 1.3                                        | 0.0001                                       | -0.2                                      | 0.4893                                      | 0.9                                         | 0.0039                                        | 0.2                                        | 0.3914                                       | At5g11090    |         | serine-rich protein-related                                  |
| 41 | 264032_at   | 1.2                                        | 0.0001                                       | -0.6                                      | 0.0170                                      | 0.0                                         | 0.9784                                        | 0.6                                        | 0.0321                                       | At2g03800    | GEK1    | D-aminoacyl-tRNA deacylases                                  |
| 42 | 263295_at   | 1.2                                        | 0.0050                                       | -0.4                                      | 0.3036                                      | 0.8                                         | 0.0593                                        | 0.0                                        | 0.9603                                       | At2g14210    | ANR1    | AGAMOUS-like 44                                              |
| 43 | 252367_at   | 1.1                                        | 0.0010                                       | -0.6                                      | 0.0488                                      | 0.0                                         | 0.9790                                        | 0.5                                        | 0.0804                                       | At3g48360    | BT2     | BTB and TAZ domain protein 2                                 |
| 44 | 263164_at   | 1.0                                        | 0.0007                                       | -0.5                                      | 0.0514                                      | 0.5                                         | 0.1079                                        | 0.1                                        | 0.7870                                       | At1g03070    |         | Bax inhibitor-1 family protein                               |
| 45 | 260923_at   | 1.0                                        | 0.0020                                       | -0.2                                      | 0.5212                                      | 0.8                                         | 0.0136                                        | 0.0                                        | 0.9290                                       | At1g21570    |         | glycine-rich RNA-binding protein grp1a, putative             |
| 46 | 256965_at   | 1.0                                        | 0.0039                                       | -0.3                                      | 0.2888                                      | 0.9                                         | 0.0085                                        | -0.3                                       | 0.4113                                       | At3g13450    | DIN4    | Transketolase family protein                                 |
| 47 | 266595_at   | 1.0                                        | 0.0016                                       | -0.5                                      | 0.0900                                      | 0.5                                         | 0.0930                                        | 0.0                                        | 0.9043                                       | At2g46180    | GC4     | golgin candidate 4                                           |
| 48 | 266223_at   | -1.0                                       | 0.0053                                       | 0.8                                       | 0.0198                                      | -0.2                                        | 0.4898                                        | 0.0                                        | 0.9991                                       | At2g28790    |         | Pathogenesis-related thaumatin superfamily protein           |
| 49 | 263977_at   | -1.0                                       | 0.0059                                       | 0.7                                       | 0.0260                                      | -0.4                                        | 0.2308                                        | 0.2                                        | 0.6285                                       | At2g42660    |         | Homeodomain-like superfamily protein                         |
| 50 | 247052_at   | -1.0                                       | 0.0003                                       | 0.2                                       | 0.4354                                      | -0.8                                        | 0.0069                                        | -0.1                                       | 0.6736                                       | At5g66700    | HB53    | homeobox 53                                                  |
| 51 | 256512_at   | -1.2                                       | 0.0024                                       | 0.2                                       | 0.4659                                      | -1.0                                        | 0.0172                                        | 0.0                                        | 0.9706                                       | At1g33265    |         | Transmembrane proteins 14C                                   |
| 52 | 246842_at   | -1.2                                       | 0.0081                                       | 0.2                                       | 0.5615                                      | -1.2                                        | 0.0164                                        | 0.2                                        | 0.7088                                       | At5g26731    |         | Expressed protein                                            |
| 53 | 255718_at   | -1.4                                       | 0.0077                                       | -0.1                                      | 0.7740                                      | -1.4                                        | 0.0125                                        | -0.2                                       | 0.7334                                       | At1g32070    | NSI     | nuclear shuttle interacting                                  |
| 54 | 254318_at   | -1.4                                       | 0.0009                                       | 0.5                                       | 0.1483                                      | -0.8                                        | 0.0456                                        | -0.1                                       | 0.8233                                       | At4g22530    |         | S-adenosyl-L-methionine-dependent methyltransferases         |
| 55 | 253056_at   | -1.5                                       | 0.0076                                       | -0.2                                      | 0.7131                                      | -0.4                                        | 0.4814                                        | -1.3                                       | 0.0184                                       | At4g37650    | SHR     | GRAS family transcription factor                             |
| 56 | 260010_at   | -1.6                                       | 0.0016                                       | 0.6                                       | 0.1271                                      | -0.6                                        | 0.1802                                        | -0.3                                       | 0.4952                                       | At1g68020    | TPS6    | UDP-Glycosyltransferase / trehalose-phosphatase protein      |
| 57 | 263360_at   | -1.6                                       | 0.0012                                       | 0.9                                       | 0.0365                                      | -0.5                                        | 0.2384                                        | -0.2                                       | 0.7095                                       | At2g03830    | RGF8    | unknown protein                                              |
| 58 | 255921_at   | -1.6                                       | 0.0070                                       | 0.3                                       | 0.5998                                      | -1.0                                        | 0.0822                                        | -0.3                                       | 0.5707                                       | At1g22240    | PUM8    | pumilio 8                                                    |
| 59 | 253063_at   | -1.7                                       | 0.0026                                       | -0.4                                      | 0.4064                                      | -1.0                                        | 0.0730                                        | -1.1                                       | 0.0362                                       | At4g37640    | ACA2    | calcium ATPase 2                                             |
| 60 | 265252_at   | -1.8                                       | 0.0093                                       | 0.7                                       | 0.2741                                      | -1.4                                        | 0.0497                                        | 0.2                                        | 0.7073                                       | At2g01980    | SOS1    | sodium proton exchanger, putative (NHX7) (SOS1)              |
| 61 | 263129_at   | -1.8                                       | 0.0086                                       | 0.2                                       | 0.7952                                      | -1.5                                        | 0.0340                                        | -0.2                                       | 0.7899                                       | At1g78620    |         | Protein of unknown function DUF92, transmembrane             |

|    |             |      |        |      |        |      |        |      |        |           |         |                                                      |
|----|-------------|------|--------|------|--------|------|--------|------|--------|-----------|---------|------------------------------------------------------|
| 62 | 248610_at   | -1.8 | 0.0035 | 1.3  | 0.0228 | -0.8 | 0.1872 | 0.2  | 0.6581 | At5g49500 |         | Signal recognition particle, SRP54 subunit protein   |
| 63 | 261825_at   | -2.0 | 0.0058 | 0.2  | 0.7766 | -1.0 | 0.1496 | -0.8 | 0.2285 | At1g11545 | XTH8    | xyloglucan endotransglucosylase/hydrolase 8          |
| 64 | 247872_at   | -2.0 | 0.0098 | -0.6 | 0.4036 | -1.9 | 0.0180 | -0.7 | 0.3573 | At5g57680 |         | putative protein                                     |
| 65 | 251304_at   | -2.1 | 0.0099 | -0.6 | 0.3744 | -0.9 | 0.2472 | -1.8 | 0.0236 | At3g61990 | OMTF3   | S-adenosyl-L-methionine-dependent methyltransferases |
| 66 | 253199_at   | -2.1 | 0.0087 | 0.2  | 0.7398 | -0.8 | 0.3392 | -1.2 | 0.1338 | At4g35410 |         | Clathrin adaptor complex small chain family protein  |
| 67 | 251685_at   | -2.2 | 0.0049 | 0.2  | 0.7801 | -1.9 | 0.0148 | -0.1 | 0.9335 | At3g56430 |         | putative protein                                     |
| 68 | 251209_at   | -2.2 | 0.0030 | -0.1 | 0.9096 | -1.0 | 0.1711 | -1.3 | 0.0607 | At3g62890 |         | Pentatricopeptide repeat (PPR) superfamily protein   |
| 69 | 257091_at   | -2.3 | 0.0080 | -0.1 | 0.8688 | -2.0 | 0.0276 | -0.5 | 0.5559 | At3g20540 | PollB   | polymerase gamma 1                                   |
| 70 | 248157_at   | -2.3 | 0.0084 | 1.3  | 0.0986 | -1.7 | 0.0559 | 0.7  | 0.4063 | At5g54420 |         | Protein of unknown function (DUF295)                 |
| 71 | 255943_at   | -2.3 | 0.0082 | 0.8  | 0.2766 | -0.9 | 0.3029 | -0.6 | 0.4498 | At1g22370 | UGT85A5 | UDP-glucosyl transferase 85A5                        |
| 72 | 266758_at   | -2.4 | 0.0010 | 1.1  | 0.0736 | -1.4 | 0.0441 | 0.1  | 0.8414 | At2g46920 | POL     | Protein phosphatase 2C family protein                |
| 73 | 265335_at   | -2.4 | 0.0094 | 0.7  | 0.3605 | -0.9 | 0.3268 | -0.8 | 0.3609 | At2g18245 |         | alpha/beta-Hydrolases superfamily protein            |
| 74 | 265918_at   | -2.5 | 0.0087 | 0.1  | 0.9404 | -2.3 | 0.0190 | -0.1 | 0.8827 | At2g15090 | KCS8    | 3-ketoacyl-CoA synthase 8                            |
| 75 | 266470_at   | -2.6 | 0.0050 | 1.9  | 0.0218 | -1.9 | 0.0378 | 1.3  | 0.1416 | At2g31080 |         | transposable element gene                            |
| 76 | 264453_at   | -2.6 | 0.0051 | 1.6  | 0.0586 | -1.6 | 0.0784 | 0.6  | 0.4902 | At1g10300 |         | Nucleolar GTP-binding protein                        |
| 77 | 245623_s_at | -2.8 | 0.0066 | 0.0  | 0.9590 | -1.4 | 0.1519 | -1.3 | 0.1732 | At4g14103 |         | F-box/RNI-like superfamily protein                   |
| 78 | 266837_x_at | -2.8 | 0.0094 | -0.1 | 0.9260 | -1.9 | 0.0836 | -1.0 | 0.3096 | At2g25990 |         | unknown protein                                      |
| 79 | 264677_at   | -2.9 | 0.0024 | 0.1  | 0.9147 | -2.0 | 0.0345 | -0.8 | 0.3377 | At1g09700 | HYL1    | dsRNA-binding domain-like superfamily protein        |
| 80 | 246800_at   | -3.0 | 0.0088 | 1.4  | 0.1750 | -2.3 | 0.0497 | 0.6  | 0.5405 | At5g26780 | SHM2    | serine hydroxymethyltransferase 2                    |
| 81 | 264353_at   | -3.2 | 0.0081 | 0.6  | 0.5592 | -0.8 | 0.4971 | -1.8 | 0.1132 | At1g03260 |         | SNARE associated Golgi protein family                |
| 82 | 261653_at   | -3.3 | 0.0021 | 0.3  | 0.7133 | -0.5 | 0.6129 | -2.5 | 0.0157 | At1g01900 | SBT1.1  | subtilase family protein                             |
