# Supplementary material
Source: PubMed Central journal article supplement (PMC8024390)
Supplement: Table_S8.pdf [file Table_S8.pdf]

|    | ProbelD     | F <sup>WT</sup> : G <sup>WT</sup><br>FC log2 | F <sup>WT</sup> : G <sup>WT</sup><br>value | F <sup>As</sup> : G <sup>As</sup><br>FC log2 | F <sup>As</sup> : G <sup>As</sup><br>p-value | G <sup>As</sup> : G <sup>WT</sup><br>FC log2 | G <sup>As</sup> : G <sup>WT</sup><br>p-value | F <sup>As</sup> : F <sup>WT</sup><br>FC log2 | F <sup>As</sup> : F <sup>WT</sup><br>p-value | Transcript ID | Gene Symbol | Description                                                           |
|----|-------------|----------------------------------------------|--------------------------------------------|----------------------------------------------|----------------------------------------------|----------------------------------------------|----------------------------------------------|----------------------------------------------|----------------------------------------------|---------------|-------------|-----------------------------------------------------------------------|
| 1  | 248008_at   | 1.90                                         | 0.0084710                                  | 2.26                                         | 0.0054395                                    | 0.41                                         | 0.5572887                                    | 0.78                                         | 0.2718024                                    | At5g56270     | WRKY2       | WRKY DNA-binding protein 2                                            |
| 2  | 256609_at   | 2.11                                         | 0.0012155                                  | 1.86                                         | 0.0076116                                    | 0.90                                         | 0.1452888                                    | 0.65                                         | 0.2886309                                    | At3g30843     |             | transposable element gene                                             |
| 3  | 258679_at   | 1.15                                         | 0.0015747                                  | 1.11                                         | 0.0046957                                    | -0.31                                        | 0.3669896                                    | -0.34                                        | 0.3211093                                    | At3g08590     | IPGAM2      | Phosphoglycerate mutase, 2,3-bisphosphoglycerate-independent          |
| 1  | 266634_at   | -2.69                                        | 0.0043031                                  | -0.05                                        | 0.9606832                                    | 0.39                                         | 0.6635244                                    | 3.04                                         | 0.0026960                                    | At2g35530     | bZIP16      | basic region/leucine zipper transcription factor 16                   |
| 2  | 267091_at   | -2.33                                        | 0.0047015                                  | 0.18                                         | 0.8238097                                    | -0.21                                        | 0.7847559                                    | 2.30                                         | 0.0077385                                    | At2g38185     |             | RING/U-box superfamily protein                                        |
| 3  | 252234_at   | -1.17                                        | 0.0011718                                  | 0.04                                         | 0.9173621                                    | -0.16                                        | 0.6277541                                    | 1.05                                         | 0.0046386                                    | At3g49780     | PSK4        | phytosulfokine 4 precursor                                            |
| 4  | 246251_at   | -1.10                                        | 0.0073858                                  | 0.33                                         | 0.4292482                                    | 0.07                                         | 0.8693121                                    | 1.50                                         | 0.0010638                                    | At4g37220     |             | Cold acclimation protein WCOR413 family                               |
| 5  | 246010_at   | -1.45                                        | 0.0044978                                  | 0.43                                         | 0.4051856                                    | -0.48                                        | 0.3284836                                    | 1.40                                         | 0.0086111                                    | At5g08440     |             |                                                                       |
| 6  | 261162_at   | -1.62                                        | 0.0022144                                  | 0.44                                         | 0.3985215                                    | -0.56                                        | 0.2668044                                    | 1.50                                         | 0.0059620                                    | At1g34440     |             |                                                                       |
| 7  | 264136_at   | -2.36                                        | 0.0004969                                  | -0.28                                        | 0.6625444                                    | 0.52                                         | 0.4002407                                    | 2.59                                         | 0.0003469                                    | At1g78980     | SRF5        | STRUBBELIG-receptor family 5                                          |
| 8  | 266440_at   | -1.34                                        | 0.0005052                                  | 0.52                                         | 0.2892075                                    | -0.51                                        | 0.2701251                                    | 1.35                                         | 0.0073675                                    | At2g43240     |             | Nucleotide-sugar transporter family protein                           |
| 9  | 259214_at   | -2.24                                        | 0.0024574                                  | 0.49                                         | 0.5017818                                    | -0.45                                        | 0.5225284                                    | 2.29                                         | 0.0032979                                    | At3g09085     |             | expressed protein DUF962                                              |
| 10 | 249622_at   | -3.33                                        | 0.0012862                                  | 0.54                                         | 0.5928941                                    | -0.93                                        | 0.3334936                                    | 2.94                                         | 0.0054930                                    | At5g37550     |             |                                                                       |
| 11 | 249968_at   | -2.65                                        | 0.0037997                                  | 2.52                                         | 0.0113722                                    | -2.30                                        | 0.0144056                                    | 2.87                                         | 0.0032272                                    | At5g19070     | ---         | SNARE associated Golgi protein family                                 |
| 12 | 264698_at   | 1.96                                         | 0.0050480                                  | -0.88                                        | 0.2195393                                    | 0.41                                         | 0.5365955                                    | -2.42                                        | 0.0015069                                    | At1g70200     |             | RNA-binding (RRM/RBD/RNP motifs) family protein                       |
| 1  | 263964_at   | -2.67                                        | 0.0038020                                  | -0.37                                        | 0.6877138                                    | -3.04                                        | 0.0021422                                    | -0.75                                        | 0.3959572                                    | At2g12880     |             | Zinc knuckle (CCHC-type) family protein                               |
| 2  | 267392_at   | 1.37                                         | 0.0039787                                  | 0.23                                         | 0.6339200                                    | 1.42                                         | 0.0049009                                    | 0.27                                         | 0.5524293                                    | At2g44490     | PEN2        | Phycocyanin hydrolase superfamily protein                             |
| 3  | 267197_at   | 1.42                                         | 0.0039302                                  | -0.25                                        | 0.6159908                                    | 1.36                                         | 0.0076856                                    | -0.30                                        | 0.5248175                                    | At2g30960     |             |                                                                       |
| 4  | 261071_at   | 1.52                                         | 0.0070145                                  | -1.55                                        | 0.0127308                                    | 1.63                                         | 0.0065132                                    | -1.44                                        | 0.0144139                                    | At1g07380     | ---         | Neutral/alkaline non-lysosomal ceramidase                             |
| 5  | 262786_at   | 1.90                                         | 0.0021518                                  | -0.40                                        | 0.5179810                                    | 2.01                                         | 0.0021869                                    | -0.28                                        | 0.6232150                                    | At1g10740     |             | alpha/beta-Hydrolases superfamily protein                             |
| 6  | 255383_at   | 2.40                                         | 0.0000963                                  | -1.22                                        | 0.0395604                                    | 2.46                                         | 0.0001402                                    | -1.16                                        | 0.0392276                                    | At4g03570     | ---         | Cytoskeleton/monoclin superfamily protein                             |
| 7  | 261452_s_at | 2.53                                         | 0.0013835                                  | 1.05                                         | 0.1818622                                    | 2.47                                         | 0.0027988                                    | 0.99                                         | 0.1873501                                    | At1g21020     |             | transposable element gene                                             |
| 8  | 248510_at   | 2.54                                         | 0.0045808                                  | -1.29                                        | 0.1631673                                    | 2.48                                         | 0.0081723                                    | -1.35                                        | 0.1248236                                    | At5g50315     |             | transposable element gene                                             |
| 9  | 263219_at   | 2.55                                         | 0.0013176                                  | 0.44                                         | 0.5710990                                    | 2.15                                         | 0.0076356                                    | 0.04                                         | 0.9591010                                    | At1g30600     |             | Subtilase family protein                                              |
| 10 | 262826_at   | 2.58                                         | 0.0000546                                  | 0.62                                         | 0.2854288                                    | 1.69                                         | 0.0051239                                    | -0.28                                        | 0.6076672                                    | At1g13080     | CYP71B2     | cytochrome P450, family 71, subfamily B, polypeptide 2                |
| 11 | 246816_at   | 3.23                                         | 0.0000096                                  | -0.06                                        | 0.9185689                                    | 3.19                                         | 0.0000230                                    | -0.10                                        | 0.8668877                                    | At5g27230     |             | Frigida-like protein                                                  |
| 12 | 267359_at   | -1.33                                        | 0.0020131                                  | 1.16                                         | 0.0119588                                    | -1.36                                        | 0.0028013                                    | 1.14                                         | 0.0098075                                    | At2g40020     | ---         | Nucleolar histone methyltransferase-related protein                   |
| 1  | 250582_at   | -3.33                                        | 0.0008117                                  | -1.19                                        | 0.2208609                                    | -0.70                                        | 0.4452994                                    | 1.44                                         | 0.1229154                                    | At5g07580     |             | Integrase-type DNA-binding superfamily protein                        |
| 2  | 254416_at   | -2.93                                        | 0.0058970                                  | -1.04                                        | 0.3374760                                    | -1.79                                        | 0.0909731                                    | 0.10                                         | 0.9242956                                    | At4g21380     | RK3         | receptor kinase 3                                                     |
| 3  | 263111_s_at | -2.83                                        | 0.0058249                                  | 0.49                                         | 0.6395757                                    | -2.09                                        | 0.0440800                                    | 1.23                                         | 0.2205251                                    | At1g65190     |             | Protein kinase superfamily protein                                    |
| 4  | 261292_at   | -2.67                                        | 0.0074709                                  | -1.00                                        | 0.3289090                                    | -0.92                                        | 0.3459486                                    | 0.75                                         | 0.4369105                                    | At1g36940     |             |                                                                       |
| 5  | 255385_at   | -2.65                                        | 0.0053916                                  | 0.04                                         | 0.9704395                                    | -2.02                                        | 0.0359352                                    | 0.66                                         | 0.4708546                                    | At4g03610     |             | Metallo-hydrolase/oxidoreductase superfamily protein                  |
| 6  | 266802_at   | -2.42                                        | 0.0019291                                  | 0.66                                         | 0.3909891                                    | -1.31                                        | 0.0837227                                    | 1.78                                         | 0.0226007                                    | At2g22900     |             | Galactosyl transferase GMA12/MNN10 family protein                     |
| 7  | 261234_x_at | -2.42                                        | 0.0090901                                  | -1.88                                        | 0.0578857                                    | -0.01                                        | 0.9895078                                    | 0.52                                         | 0.5610168                                    | At1g32830     |             | transposable element gene                                             |
| 8  | 251383_at   | -2.22                                        | 0.0032967                                  | -0.95                                        | 0.2145388                                    | -0.05                                        | 0.9493757                                    | 1.22                                         | 0.0983787                                    | At3g60740     | TTN1        | ARM repeat superfamily protein                                        |
| 9  | 249037_at   | -2.05                                        | 0.0068589                                  | 0.02                                         | 0.9828701                                    | -0.37                                        | 0.6126140                                    | 1.70                                         | 0.0290265                                    | At5g44130     | FLA13       | FASCICLIN-like arabinogalactan protein 13 precursor                   |
| 10 | 260132_s_at | -2.04                                        | 0.0080899                                  | -0.23                                        | 0.7682945                                    | -0.21                                        | 0.7802073                                    | 1.60                                         | 0.0416466                                    | At1g66640     |             | RNI-like superfamily protein                                          |
| 11 | 257045_at   | -2.02                                        | 0.0062346                                  | 0.28                                         | 0.7057284                                    | -1.02                                        | 0.1593546                                    | 1.28                                         | 0.0827771                                    | At1g19730     |             |                                                                       |
| 12 | 263911_at   | -1.85                                        | 0.0063162                                  | -1.10                                        | 0.1207922                                    | 0.45                                         | 0.4908058                                    | 1.20                                         | 0.0758599                                    | At2g36560     |             | AT hook motif DNA-binding family protein                              |
| 13 | 246247_at   | -1.83                                        | 0.0069238                                  | -0.17                                        | 0.8039265                                    | -0.04                                        | 0.9534742                                    | 1.63                                         | 0.0205712                                    | At4g36640     |             | Sec14p-like phosphatidylinositol transfer family protein              |
| 14 | 247971_at   | -1.66                                        | 0.0039375                                  | -1.32                                        | 0.0310940                                    | 0.00                                         | 0.9930104                                    | 0.34                                         | 0.5299717                                    | At5g56730     |             | Insulinase (Peptidase family M16) protein                             |
| 15 | 267544_at   | -1.51                                        | 0.0050252                                  | -0.45                                        | 0.4064900                                    | -0.15                                        | 0.7747499                                    | 0.91                                         | 0.0884619                                    | At2g32720     | CB5-B       | cytochrome B5 isoform B                                               |
| 16 | 262975_at   | -1.43                                        | 0.0068833                                  | -0.59                                        | 0.2788916                                    | 0.10                                         | 0.8388447                                    | 0.95                                         | 0.0753721                                    | At1g75540     | STH2        | Salt tolerance homolog 2                                              |
| 17 | 261220_at   | -1.38                                        | 0.0030377                                  | -0.47                                        | 0.3207430                                    | -0.01                                        | 0.9737118                                    | 0.90                                         | 0.0510293                                    | At1g19970     |             | ER lumen protein retaining receptor family protein                    |
| 18 | 246199_at   | -1.24                                        | 0.0088399                                  | 0.02                                         | 0.9614280                                    | -0.58                                        | 0.2141701                                    | 0.68                                         | 0.1475969                                    | At4g36530     |             | alpha/beta-Hydrolases superfamily protein                             |
| 19 | 262135_at   | -1.18                                        | 0.0080034                                  | 0.31                                         | 0.5017978                                    | -0.29                                        | 0.5096776                                    | 1.20                                         | 0.0104235                                    | At1g78080     | WIND1       | related to AP2 4                                                      |
| 20 | 264042_at   | 1.07                                         | 0.0004452                                  | 0.55                                         | 0.0685531                                    | 0.08                                         | 0.7753814                                    | -0.44                                        | 0.1154238                                    | At2g03760     | ST1         | sulphotransferase 12                                                  |
| 21 | 250807_at   | 1.15                                         | 0.0070350                                  | 0.32                                         | 0.4649764                                    | 0.66                                         | 0.1190403                                    | -0.17                                        | 0.6786337                                    | At5g05130     |             | DNA/RNA helicase protein                                              |
| 22 | 259757_at   | 1.22                                         | 0.0038449                                  | 0.69                                         | 0.1117209                                    | 0.06                                         | 0.8715359                                    | -0.46                                        | 0.2564992                                    | At1g77510     | PDIL1-2     | PDI-like 1-2                                                          |
| 23 | 264299_s_at | 1.26                                         | 0.0000016                                  | 0.82                                         | 0.0009149                                    | 0.27                                         | 0.1863920                                    | -0.18                                        | 0.3865269                                    | At1g78860     |             | D-mannose binding lectin protein with Apple-like carbohydrate-binding |
| 24 | 248987_at   | 1.27                                         | 0.0027261                                  | 0.46                                         | 0.2813651                                    | 0.12                                         | 0.7697889                                    | -0.69                                        | 0.0930492                                    | At5g45180     |             | Flavin-binding monooxygenase family protein                           |
| 25 | 247441_at   | 1.36                                         | 0.0023474                                  | -0.20                                        | 0.6514840                                    | 0.44                                         | 0.3001445                                    | -1.12                                        | 0.0135960                                    | At5g62710     |             | Leucine-rich repeat protein kinase family protein                     |
| 26 | 254316_at   | 1.51                                         | 0.0066999                                  | 1.55                                         | 0.0117268                                    | 0.49                                         | 0.3634701                                    | 0.53                                         | 0.3285400                                    | At4g22500     |             |                                                                       |
| 27 | 264489_at   | 1.69                                         | 0.0099698                                  | 1.15                                         | 0.0983338                                    | 0.25                                         | 0.7002922                                    | -0.30                                        | 0.6384206                                    | At1g27370     | SPL10       | squamosa promoter binding protein-like 10                             |
| 28 | 248770_at   | 1.73                                         | 0.0086638                                  | 1.13                                         | 0.1057680                                    | 0.58                                         | 0.3710867                                    | -0.03                                        | 0.9641601                                    | At5g47740     |             | Adenine nucleotide alpha hydrolases-like superfamily protein          |
| 29 | 255175_at   | 1.93                                         | 0.0039176                                  | 0.42                                         | 0.5267764                                    | 1.36                                         | 0.0427237                                    | -0.15                                        | 0.8172566                                    | At4g07960     | CSLC12      | Cellulose-synthase-like C12                                           |
| 30 | 258943_at   | 2.00                                         | 0.0081794                                  | 0.25                                         | 0.7424899                                    | 1.45                                         | 0.0575551                                    | -0.29                                        | 0.6904473                                    | At3g10400     | U11/U12-31  | RNA recognition motif and CCHC-type zinc finger domains containi      |
| 31 | 247415_at   | 2.21                                         | 0.0071824                                  | -0.20                                        | 0.8100161                                    | 2.08                                         | 0.0150101                                    | -0.33                                        | 0.6795405                                    | At5g63060     |             | Sec14p-like phosphatidylinositol transfer family protein              |
| 32 | 266591_at   | 2.23                                         | 0.0083512                                  | 1.06                                         | 0.2266371                                    | 0.61                                         | 0.4612251                                    | -0.56                                        | 0.4943691                                    | At2g46225     | ABI1        | ABI-1-like 1                                                          |
| 33 | 255481_at   | 2.24                                         | 0.0060251                                  | 0.79                                         | 0.3456153                                    | 1.52                                         | 0.0640732                                    | 0.06                                         | 0.9373897                                    | At4g02460     | PMS1        | DNA mismatch repair protein, putative                                 |
| 34 | 247333_at   | 2.26                                         | 0.0051845                                  | 0.38                                         | 0.6380373                                    | 0.98                                         | 0.2144059                                    | -0.90                                        | 0.2532462                                    | At5g63600     | FLS5        | flavonol synthase 5                                                   |
| 35 | 258672_at   | 2.27                                         | 0.0035952                                  | 0.39                                         | 0.6151316                                    | 0.86                                         | 0.2505957                                    | -1.02                                        | 0.1791070                                    | At3g08570     |             | Phototropic-responsive NPH3 family protein                            |
| 36 | 257504_at   | 2.29                                         | 0.0081475                                  | -1.35                                        | 0.1367413                                    | 1.70                                         | 0.0523954                                    | -1.93                                        | 0.0296479                                    | At1g52250     |             |                                                                       |
| 37 | 251068_at   | 2.38                                         | 0.0033363                                  | 0.17                                         | 0.8373899                                    | 1.54                                         | 0.0552956                                    | -0.67                                        | 0.3843021                                    | At5g01920     | STN8        | Protein kinase superfamily protein                                    |
| 38 | 248708_at   | 2.40                                         | 0.0082560                                  | 0.41                                         | 0.6585713                                    | 2.06                                         | 0.0275509                                    | 0.07                                         | 0.9337598                                    | At5g48560     |             | basic helix-loop-helix (bHLH) DNA-binding superfamily protein         |
| 39 | 253636_at   | 2.45                                         | 0.0090255                                  | 1.69                                         | 0.0886267                                    | 0.33                                         | 0.7148919                                    | -0.42                                        | 0.6423062                                    | At4g30500     |             | Protein of unknown function (DUF788)                                  |
| 40 | 262102_at   | 2.45                                         | 0.0073503                                  | 0.62                                         | 0.5039325                                    | 1.89                                         | 0.0420364                                    | 0.07                                         | 0.9411359                                    | At1g02980     | CUL2        | cullin 2                                                              |
| 41 | 260156_at   | 2.49                                         | 0.0095623                                  | 0.01                                         | 0.9944299                                    | 2.35                                         | 0.0191205                                    | -0.13                                        | 0.8852921                                    | At1g52880     | NARS2       | NAC (No Apical Meristem) domain transcriptional regulator superfa     |
| 42 | 252739_at   | 2.57                                         | 0.0072665                                  | 0.32                                         | 0.7423509                                    | 2.31                                         | 0.0194905                                    | 0.07                                         | 0.9427859                                    | At3g43250     |             | Family of unknown function (DUF572)                                   |
| 43 | 251262_at   | 2.61                                         | 0.0019926                                  | 0.91                                         | 0.2823918                                    | 1.47                                         | 0.0739605                                    | -0.24                                        | 0.7631173                                    | At3g62080     |             | SNF7 family protein                                                   |
| 44 | 247704_at   | 2.70                                         | 0.0039937                                  | 1.09                                         | 0.2546979                                    | 1.02                                         | 0.2580896                                    | -0.59                                        | 0.5102503                                    | At5g59515     |             |                                                                       |
| 45 | 260265_at   | 2.71                                         | 0.0087765                                  | 1.39                                         | 0.1965666                                    | 0.86                                         | 0.3938962                                    | -0.46                                        | 0.6493210                                    | At1g68510     | LBD42       | LOB domain-containing protein 42                                      |
| 46 | 259970_at   | 2.81                                         | 0.0028612                                  | 0.61                                         | 0.5184566                                    | 1.07                                         | 0.2363087                                    | -1.13                                        | 0.2103421                                    | At1g76570     |             | Chlorophyll A-B binding family protein                                |
| 47 | 249647_at   | 2.86                                         | 0.0058477                                  | 0.81                                         | 0.4421693                                    | 0.46                                         | 0.6446583                                    | -1.59                                        | 0.1215311                                    | At5g37040     |             | F-box family protein                                                  |
| 48 | 262276_at   | 3.00                                         | 0.0038842                                  | 1.60                                         | 0.1331478                                    | 1.09                                         | 0.2765720                                    | -0.30                                        | 0.7575158                                    | At1g68700     |             |                                                                       |
| 49 | 257064_at   | 3.11                                         | 0.0007591                                  | 0.02                                         | 0.9793025                                    | 2.04                                         | 0.0232561                                    | -1.05                                        | 0.2215026                                    | At3g18260     |             | Reticulon family protein                                              |
| 50 | 249482_at   | 3.30                                         | 0.0067735                                  | -0.45                                        | 0.7181605                                    | 1.83                                         | 0.1287738                                    | -1.91                                        | 0.1143589                                    | At5g38980     |             |                                                                       |
| 51 | 257682_at   | 3.55                                         | 0.0010934                                  | -0.46                                        | 0.6610709                                    | 2.53                                         | 0.0186898                                    | -1.49                                        | 0.1472734                                    | At3g13240     |             |                                                                       |
