# Supplementary material
Source: PubMed Central journal article supplement (PMC8024390)
Supplement: Table_S9.pdf [file Table_S9.pdf]

|                                                                     | <b>BRIC16</b>                 | <b>BRIC17</b>            |
|---------------------------------------------------------------------|-------------------------------|--------------------------|
| <i>AGENCY/COMPANY</i>                                               | NASA                          | NASA, SpaceX             |
| <i>SPACE VEHICLE</i>                                                | Discovery Space Shuttle, NASA | Dragon, Falcon 9, SpaceX |
| <i>MISSION</i>                                                      | STS-131                       | CRS 2                    |
| <i>DATE</i>                                                         | April 2010                    | March 2013               |
| <i>LOCATION ON ORBIT</i>                                            | Space Shuttle Middeck locker  | Moved to ISS             |
| <i>DAYS ON ORBIT PRIOR IN-FLIGHT FIXATION</i>                       | 12 days 20 hours              | 10 days                  |
| <i>BRIC HARDWARE PAYLOAD</i>                                        | A, B, G                       | A, B                     |
| <i>TISSUE CULTURE CELL LINES</i>                                    | WT                            | WT, ARG1 KO, HSFA2 KO    |
| <i>TOTAL TISSUE CULTURE PLATES IN SPACEFLIGHT</i>                   | 7                             | 10                       |
| <i>DAYS ON MEDIA PLATES PRIOR TO TURNOVER (48 hrs PRIOR LAUNCH)</i> | 7 days                        | 0.5 days                 |
| <i>CELL AGE ON MEDIA PLATES AT THE TIME OF FIXATION</i>             | ca 22 days                    | ca 12.5 days             |
